# Supplementary material for: A systematic view on influenza induced host shutoff
Source: eLife. 2016 Aug 15;5:e18311. doi: 10.7554/eLife.18311 (PMC5028189; doi:10.7554/eLife.18311)
Supplement: Supplementary file 1. — The numbers are an average of two independent biological repeats. DOI: http://dx.doi.org/10.7554/eLife.18311.015 [file elife-18311-supp1.xlsx]

## Sheet: Sheet1
	footprint			mRNA
gene symbol	2hr	4hr	8hr	2hr	4hr	8hr
SAMD11	0.791709	0.510028	0.316261	1.08504	0.722299	0.203703
IFI6	1.1689	6.75593	11.0175	1.36395	9.99566	20.3608
NR4A1	1.11893	0.114045	0.0291844	1.30842	0.133769	0.0345138
TBX3	0.855514	1.04425	1.10745	1.04636	1.21564	1.17733
MYC	0.770563	0.951562	0.735757	0.888022	1.17738	0.625803
LAMP2	0.885305	0.484515	0.145303	0.935369	0.576256	0.317166
CHML	0.970998	0.624285	0.150187	0.960109	0.370666	0.0586221
KIF18A	1.05673	0.459184	0.198721	0.904747	0.322624	0.099041
CDKN1B	0.824451	0.504468	1.18109	1.03197	0.616868	1.53671
IL6	9.19235	10.2246	3.5451	9.65015	8.20724	2.77809
HES4	0.907907	1.25998	1.68557	0.940262	1.91539	1.58944
ISG15	3.2938	14.3055	21.6895	4.5823	22.3942	37.2791
AGRN	0.952552	0.694974	0.197714	1.16668	0.881564	0.383573
SDF4	0.78463	0.555005	0.272049	1.02102	0.738029	0.331344
B3GALT6	0.771067	0.668272	0.19583	0.997021	0.816292	0.285307
MIB2	0.723309	0.66925	0.210349	1.15735	0.750075	0.296378
UBE2J2	0.893763	0.459189	0.171817	0.852005	0.627629	0.201155
ACAP3	0.997491	0.801234	0.298142	1.00809	0.662633	0.315913
PUSL1	0.829444	0.361079	0.144293	1.06994	0.691894	0.269529
CPSF3L	0.857078	0.492264	0.124656	0.985118	0.594593	0.175379
DVL1	1.03521	0.766133	0.484266	0.966641	0.594068	0.185419
CCNL2	0.819628	0.593821	0.40569	0.807034	0.639143	0.20428
MRPL20	0.805895	0.553154	0.377364	1.03446	0.778006	0.538221
MEGF6	0.575843	0.495967	0.0821529	0.912352	0.596514	0.116986
VWA1	0.708075	0.51584	0.179169	1.12832	0.693455	0.175747
SSU72	0.845077	0.492944	0.29519	0.940641	0.592735	0.262243
NADK	0.910953	0.601204	0.29453	0.977109	0.7033	0.417607
GNB1	0.786073	0.574131	0.317142	0.96313	0.706941	0.319789
PRKCZ	0.623811	0.338658	0.10254	0.956114	0.505917	0.110132
SKI	0.894008	0.763524	0.33674	1.05356	0.73246	0.24011
RER1	0.794638	0.555279	0.345225	1.04912	0.76604	0.477816
PEX10	0.862774	0.680913	0.327283	1.00786	0.804592	0.248985
PANK4	0.982337	0.522597	0.212516	0.934031	0.4692	0.125321
TPRG1L	1.04888	0.5775	0.356845	1.11403	0.626589	0.326648
WRAP73	0.834327	0.491335	0.160553	0.999881	0.611378	0.297375
LRRC47	0.712487	0.565843	0.269157	1.06786	0.80503	0.384105
CEP104	1.22684	0.694222	0.41877	0.98651	0.644513	0.364782
C1orf174	0.675362	0.444571	0.270836	0.910685	0.755174	0.479487
KCNAB2	0.958502	0.573814	0.161488	1.05494	0.630149	0.124618
ICMT	0.782816	0.557169	0.29916	0.994375	0.623087	0.309545
ACOT7	0.875331	0.488918	0.224872	1.06777	0.797515	0.365951
NOL9	0.759786	0.42985	0.158599	1.072	0.642246	0.235803
KLHL21	0.590173	0.509944	0.23214	0.874411	0.695328	0.293545
DNAJC11	0.827819	0.53094	0.189845	1.0142	0.728259	0.262966
CAMTA1	0.610666	0.42484	0.31335	1.01166	0.695898	0.543454
VAMP3	0.815947	0.524192	0.386313	0.987714	0.766559	0.456089
PARK7	0.782758	0.586107	0.302294	1.09508	0.851196	0.672529
ERRFI1	1.00053	0.394531	0.14574	1.13914	0.404625	0.117172
RERE	0.811299	0.678994	0.146997	0.95435	0.550489	0.123673
ENO1	0.71936	0.493686	0.162088	1.05234	0.719599	0.399026
H6PD	0.929518	0.608791	0.120954	0.936076	0.586303	0.165003
CLSTN1	0.85709	0.491589	0.12395	1.14045	0.684981	0.263781
LZIC	0.738461	0.594967	0.212117	0.99957	0.670933	0.355037
UBE4B	0.772984	0.396354	0.0787529	1.06361	0.488737	0.125749
KIF1B	0.820929	0.457574	0.129444	0.997624	0.469475	0.130961
PGD	0.842621	0.481467	0.103457	1.07801	0.642354	0.211483
DFFA	0.878629	0.298736	0.109179	1.01842	0.518268	0.266257
PEX14	0.695755	0.386259	0.0587304	1.08176	0.611382	0.167127
VPS13D	0.846049	0.486634	0.189126	1.06451	0.545266	0.0981765
TARDBP	0.851	0.334913	0.0497735	0.897584	0.363654	0.148019
SRM	0.828382	0.619211	0.535392	1.03998	0.767058	0.501656
EXOSC10	0.652495	0.462969	0.185816	0.954532	0.612803	0.249088
MTOR	0.847102	0.435996	0.157533	1.08802	0.570244	0.181486
UBIAD1	0.854508	0.604762	0.193745	1.06029	0.604108	0.230595
AGTRAP	0.69956	0.457923	0.269741	1.03154	0.690691	0.330765
CLCN6	0.832976	0.555533	0.120933	1.06014	0.501236	0.168611
PLOD1	0.86983	0.53052	0.228812	1.05611	0.621791	0.331207
MIIP	0.535051	0.444473	0.282659	0.999077	0.654446	0.460589
DHRS3	0.825715	0.427143	0.21294	1.11516	0.609801	0.291372
PRDM2	1.32656	0.674953	0.460951	0.954523	0.578231	0.219462
TMEM51	0.753209	0.66758	0.264615	1.12633	1.09972	0.45736
EFHD2	0.790849	0.5262	0.257695	0.99448	0.66298	0.336344
CASP9	0.657163	0.323402	0.0941427	0.79502	0.423543	0.17118
DNAJC16	0.72399	0.408905	0.151426	0.844937	0.584928	0.256338
SPEN	0.930942	0.869254	0.536077	1.0228	0.852662	0.405786
ZBTB17	0.58293	0.515244	0.149894	0.995666	0.56058	0.117071
EPHA2	0.958391	0.454692	0.518825	1.17994	0.663887	0.897027
FBXO42	0.847603	0.517315	0.33823	0.915859	0.527482	0.207555
SZRD1	1.04512	0.644679	0.41547	0.942135	0.586835	0.358632
NECAP2	0.721073	0.61685	0.24385	0.971416	0.735212	0.325056
ATP13A2	0.982106	0.597165	0.28164	0.996423	0.687798	0.275138
SDHB	0.768677	0.549333	0.251661	0.961842	0.684399	0.490708
ARHGEF10L	1.0884	0.451189	0.065009	1.18939	0.478813	0.140922
KLHDC7A	0.928338	0.34309	0.215176	1.05535	0.570848	0.295934
ALDH4A1	0.746643	0.445066	0.127497	1.02879	0.648596	0.259773
IFFO2	0.766648	0.687561	0.496689	1.09479	1.16046	0.716791
UBR4	0.922557	0.466905	0.200062	0.931181	0.497637	0.133272
EMC1	0.79917	0.463029	0.167845	1.08485	0.640917	0.301831
MRTO4	0.901111	0.602896	0.305018	1.00494	0.670072	0.423715
AKR7A2	0.67853	0.497606	0.334666	1.09559	0.861913	0.518825
PQLC2	0.729936	0.464045	0.10167	0.889497	0.656007	0.137135
NBL1	0.841895	0.725688	0.373171	0.98477	0.875405	0.515812
CAMK2N1	0.621198	0.593057	0.580236	1.03682	0.852372	0.686026
MUL1	0.614987	0.428069	0.236624	0.997918	0.613662	0.38117
CDA	0.735485	0.527956	0.352623	0.855717	0.613378	0.450033
PINK1	0.721848	0.520215	0.193624	1.0135	0.635254	0.236503
DDOST	0.760422	0.490989	0.259534	1.03522	0.698898	0.39275
HP1BP3	0.809464	0.523855	0.169589	1.01333	0.628218	0.207238
EIF4G3	0.946766	0.495747	0.148992	0.954394	0.486628	0.111623
ECE1	0.849542	0.514068	0.20418	1.02737	0.636008	0.247273
RAP1GAP	1.07515	0.684967	0.147194	1.06652	0.56586	0.166936
USP48	1.18853	0.509022	0.151244	0.999683	0.553584	0.161868
HSPG2	1.1665	0.452688	0.127689	1.25401	0.509453	0.164111
ZBTB40	0.994153	0.534323	0.117957	0.854432	0.607275	0.10157
EPHB2	0.940315	0.631383	0.218132	1.09271	0.617799	0.191632
KDM1A	0.890491	0.488047	0.180216	1.02677	0.557683	0.165931
HNRNPR	0.787993	0.496273	0.143572	1.05851	0.68206	0.192443
ID3	0.603051	0.245525	0.223127	0.844313	0.372708	0.437281
RPL11	0.659715	0.57447	0.332295	0.980728	0.7484	0.660486
TCEB3	1.14276	0.658295	0.754418	1.0596	0.70086	0.662226
PITHD1	0.627972	0.492283	0.200737	0.770945	0.621693	0.189108
HMGCL	0.729163	0.342081	0.0760992	0.974927	0.610785	0.20565
FUCA1	0.843316	0.529124	0.347451	1.05321	0.80301	0.521274
SRRM1	0.906533	0.538232	0.270546	1.15964	0.722065	0.463712
SYF2	0.939756	0.502989	0.27464	1.05887	0.615871	0.424383
C1orf63	0.952941	1.07789	3.06823	0.983269	0.636919	1.0341
TMEM50A	0.797814	0.550838	0.242825	0.977831	0.718984	0.470214
TMEM57	0.795737	0.537174	0.133305	0.889194	0.542264	0.173953
MTFR1L	0.695205	0.579503	0.388873	0.938335	0.721149	0.438566
ZNF593	0.620216	0.464422	0.208326	0.871161	0.711237	0.361635
CEP85	0.893337	0.399845	0.253919	1.01148	0.510443	0.18444
SH3BGRL3	0.795284	0.54857	0.373505	0.988692	0.805528	0.69114
UBXN11	1.20753	1.01919	0.42461	1.10795	0.788202	0.398676
DHDDS	0.801926	0.474676	0.160511	1.05657	0.719758	0.325978
MAP3K6	0.797714	0.530928	0.223696	1.01757	0.525273	0.162833
RPS6KA1	0.744449	0.439965	0.124732	0.949819	0.525229	0.157186
ARID1A	1.13151	0.613081	0.193233	0.999279	0.606319	0.194232
PIGV	0.73683	0.430566	0.130029	0.949019	0.514795	0.119403
ZDHHC18	0.646359	0.688357	0.431978	0.950401	0.665135	0.271252
SFN	0.70665	0.700908	0.615107	1.02671	1.09096	1.10408
GPN2	0.810311	0.412287	0.245054	1.06798	0.698811	0.381889
NUDC	0.815673	0.620124	0.38891	1.30091	1.00131	0.604818
TRNP1	0.584354	0.555291	0.43473	0.935808	0.825073	0.456721
TMEM222	0.840444	0.698331	0.329354	0.920588	0.745387	0.488303
STX12	0.724148	0.659729	0.314019	1.03535	0.763277	0.514405
PPP1R8	0.779954	0.369389	0.159798	1.03085	0.662438	0.165925
RPA2	1.06409	0.50034	0.265348	1.13438	0.729642	0.30776
ATPIF1	0.838718	0.621768	0.49888	1.09046	0.894909	0.868409
SESN2	0.632516	1.7082	1.86732	1.23129	2.3318	2.50906
PHACTR4	0.831132	0.840611	0.312989	1.04775	1.19077	0.408687
SNHG3	1.2339	0.62623	0.725728	0.957966	0.678695	0.471259
RCC1	0.840969	0.561328	0.322045	1.05619	0.691189	0.52295
TRNAU1AP	0.824098	0.634406	0.266719	0.884143	0.68214	0.38305
GMEB1	1.07825	0.563579	0.209457	0.990985	0.51194	0.19182
EPB41	0.718167	0.381522	0.127713	0.972223	0.425304	0.12913
SRSF4	0.807453	0.438459	0.239117	0.945832	0.63656	0.452047
MECR	0.736033	0.525972	0.427886	0.850063	0.691779	0.452361
PTPRU	0.917421	0.390411	0.0622922	1.23337	0.53684	0.0904186
PUM1	0.871436	0.478079	0.219212	0.998866	0.49737	0.280263
SNRNP40	0.891908	0.518162	0.166875	1.10882	0.687983	0.313319
ZCCHC17	0.611661	0.516107	0.224624	0.934774	0.57989	0.181826
PEF1	0.818169	0.521752	0.105995	0.964548	0.677669	0.224485
KHDRBS1	0.73348	0.499711	0.202857	1.0312	0.710089	0.351667
KPNA6	0.852826	0.435368	0.0999171	1.06935	0.587457	0.195093
TXLNA	0.750656	0.550974	0.139881	1.0255	0.800629	0.269047
HDAC1	1.01478	0.519515	0.26054	1.09134	0.703531	0.376151
ZMYM6	1.16343	0.559948	0.176921	0.880701	0.533454	0.212083
MARCKSL1	0.682032	0.611803	0.548928	1.20544	0.947086	0.725021
KIAA1522	0.8952	0.766806	0.293142	1.01481	0.759209	0.221075
YARS	0.79114	0.606499	0.346955	1.03404	0.868748	0.458852
TMEM54	1.1139	0.747864	0.933271	0.934268	0.780415	0.530553
ZNF362	0.733734	0.436803	0.190791	0.912975	0.382141	0.227723
PHC2	0.714644	0.458339	0.319588	0.906065	0.561091	0.346655
SMIM12	0.737259	0.452188	0.195757	0.91584	0.733374	0.200559
ZMYM6NB	0.792049	0.506682	0.299679	0.961528	0.739871	0.38809
ZMYM1	0.922773	0.403723	0.173022	0.968353	0.475792	0.136362
SFPQ	0.771895	0.543596	0.185166	1.00395	0.639875	0.255328
ZMYM4	1.2761	0.777063	0.334661	1.04629	0.621103	0.175439
KIAA0319L	0.88194	0.542096	0.113626	1.00223	0.460286	0.134354
NCDN	0.753241	0.573414	0.133092	1.0001	0.688076	0.217321
PSMB2	0.813712	0.586559	0.313011	1.01417	0.722739	0.458065
CLSPN	0.940626	0.419452	0.103823	1.15185	0.579539	0.163475
AGO1	0.813587	0.50438	0.197701	1.02189	0.587524	0.147349
ADPRHL2	0.674234	0.66676	0.287021	0.981589	0.985778	0.406463
MAP7D1	0.727785	0.538889	0.301155	0.940474	0.701554	0.360031
THRAP3	0.9287	0.6124	0.155098	1.03668	0.53374	0.173975
EVA1B	0.760667	0.673691	0.314043	1.08094	0.826047	0.445525
LSM10	1.25073	0.578527	0.328674	0.853126	0.624076	0.368947
MRPS15	0.725517	0.564621	0.349327	1.00432	0.708611	0.474733
ZC3H12A	0.99867	0.642082	0.967656	1.35169	0.649981	0.916486
SNIP1	0.968347	0.41889	0.371553	1.22056	0.575037	0.71835
GNL2	0.780308	0.536459	0.195334	0.910033	0.674378	0.285219
C1orf109	0.918647	0.675378	0.959532	1.1779	0.965423	1.52945
CDCA8	0.660949	0.409691	0.24752	0.99089	0.576266	0.360086
MANEAL	0.9455	0.568202	0.154572	1.04253	0.452336	0.165699
YRDC	0.663674	0.529726	0.720786	1.14569	0.924994	1.1158
C1orf122	0.619196	0.568425	0.531502	1.02883	0.998916	0.942655
RLF	0.962373	0.522042	0.446888	0.986422	0.47853	0.473964
UTP11L	0.689429	0.488498	0.196155	1.00635	0.686195	0.277288
RRAGC	0.85797	0.787838	0.669968	0.879524	0.794248	0.767343
AKIRIN1	0.665437	0.463717	0.206574	0.938037	0.712084	0.256529
NDUFS5	1.05718	0.574926	0.173515	0.920056	0.64808	0.483836
PABPC4	0.860727	0.683986	0.234354	0.975817	0.594326	0.224827
PPIE	0.676563	0.469812	0.254179	1.11411	0.738857	0.436742
CAP1	0.707022	0.478617	0.168046	1.01679	0.541985	0.151303
PPT1	0.841551	0.480872	0.219417	1.06568	0.667695	0.357905
ZMPSTE24	0.834851	0.545986	0.260312	1.03499	0.752659	0.473313
CITED4	0.583964	0.418394	0.345111	1.05335	0.807972	0.714964
SZT2	1.13554	0.588495	0.312778	1.0788	0.637309	0.224873
CTPS1	0.781386	0.591516	0.143509	0.921634	0.665283	0.138594
FOXJ3	0.812284	0.438995	0.207666	0.914336	0.456453	0.198642
PPCS	0.847043	0.517784	0.272619	1.04489	0.623122	0.311169
PPIH	0.700788	0.492864	0.270548	1.16618	0.874976	0.62082
LEPRE1	0.792612	0.484036	0.22769	1.07877	0.707532	0.360788
SLC2A1	0.861123	0.39259	0.145887	1.16432	0.584305	0.265128
CDC20	0.859726	0.458048	0.212621	1.07829	0.718764	0.381854
MED8	0.855203	0.509378	0.229438	0.934062	0.624271	0.250088
PTPRF	0.861082	0.525425	0.110448	1.06167	0.542486	0.0982709
KDM4A	0.902425	0.515991	0.134189	1.07643	0.579152	0.174406
IPO13	0.806706	0.648962	0.24228	1.05913	0.934958	0.517916
DPH2	0.760439	0.470208	0.324514	0.935531	0.584169	0.450324
ATP6V0B	0.753952	0.653589	0.60133	0.979047	0.858457	0.897256
DMAP1	0.90952	0.628512	0.251075	1.00256	0.776642	0.228083
ERI3	0.78655	0.492354	0.250016	0.903239	0.605063	0.280305
RNF220	0.756844	0.51158	0.262612	1.04654	0.617818	0.303234
TMEM53	0.820171	0.525109	0.167116	0.833056	0.602146	0.173878
KIF2C	0.797325	0.48605	0.266416	1.06499	0.590098	0.35047
PLK3	0.809697	0.470903	0.389232	1.03955	0.433152	0.304409
EIF2B3	0.751343	0.545584	0.175643	1.00784	0.677225	0.287338
UROD	0.730332	0.503081	0.382411	0.979485	0.787038	0.573897
AKR1A1	0.833412	0.593595	0.268526	0.968733	0.708302	0.366922
NASP	1.05608	0.685158	0.233649	1.0868	0.613492	0.251544
GPBP1L1	1.50133	1.1967	0.925442	1.07828	0.592516	0.290698
IPP	1.03081	0.310376	0.137659	1.04057	0.395377	0.133335
MAST2	0.953641	0.636421	0.114624	1.08021	0.549094	0.118292
POMGNT1	0.867017	0.710506	0.509555	0.999429	0.71253	0.289347
LRRC41	0.758484	0.521497	0.205973	1.00711	0.756843	0.221633
NSUN4	0.72655	0.416355	0.223377	0.996229	0.571012	0.258861
MKNK1	0.652066	0.42058	0.158276	1.01689	0.786112	0.331048
ATPAF1	0.67663	0.496564	0.336711	0.89128	0.670504	0.42381
EFCAB14	1.30995	0.773482	0.471014	0.978921	0.469748	0.123093
STIL	1.11816	0.573353	0.312312	1.1549	0.56485	0.33437
CMPK1	0.814417	0.526633	0.286076	0.979574	0.697645	0.360861
ZFYVE9	0.966265	0.56445	0.125867	0.974735	0.487395	0.126371
FAF1	0.993267	0.494433	0.174363	1.00343	0.604835	0.126584
CDKN2C	1.07997	1.28311	1.91148	1.29763	1.23225	1.56204
EPS15	0.886656	0.565139	0.271546	1.01887	0.577295	0.180068
OSBPL9	0.984119	0.474355	0.133358	0.965463	0.483493	0.121301
NRD1	0.874335	0.545304	0.208729	1.01087	0.639873	0.276465
RAB3B	0.739213	0.426135	0.122756	0.813894	0.608467	0.231594
TXNDC12	0.860695	0.59873	0.37551	0.972669	0.760846	0.595942
KTI12	0.638066	0.27837	0.285877	1.01299	0.485277	0.449356
CC2D1B	0.900985	0.464491	0.165659	1.07915	0.548788	0.132783
ORC1	0.857097	0.52975	0.16209	1.13434	0.527866	0.179272
ZCCHC11	0.905288	0.563413	0.222245	1.02068	0.525526	0.124016
SELRC1	0.720469	0.4206	0.28239	1.02833	0.603951	0.320749
ZYG11B	0.963256	0.532084	0.156664	1.05382	0.555943	0.182233
SCP2	0.83395	0.542918	0.310501	1.02626	0.689009	0.437434
CPT2	0.835813	0.382934	0.191099	1.01559	0.500175	0.445172
C1orf123	0.734483	0.574046	0.296753	0.924168	0.834291	0.477965
LRP8	1.06961	0.699546	0.236146	1.00742	0.623348	0.168633
NDC1	0.913211	0.546831	0.180311	1.03208	0.507509	0.211212
YIPF1	0.831374	0.467842	0.210186	1.00592	0.724292	0.42495
HSPB11	0.861779	0.588317	0.322815	0.899174	0.726621	0.443691
LRRC42	0.800901	0.446315	0.360091	0.95782	0.596802	0.514987
TMEM59	0.783706	0.552951	0.332497	0.935845	0.747865	0.489823
MRPL37	0.76806	0.529183	0.30497	0.890975	0.630524	0.289015
TTC4	0.694426	0.368272	0.208849	1.09228	0.785089	0.494011
DHCR24	0.924558	0.485629	0.170805	1.0964	0.566093	0.208998
PCSK9	0.873071	0.320515	0.0357129	1.25043	0.502611	0.141916
PPAP2B	0.894604	0.343899	0.0846214	0.967624	0.460555	0.0755271
PRKAA2	0.903146	0.669355	0.201319	1.098	0.739803	0.251265
OMA1	0.773819	0.391575	0.193211	1.03409	0.592701	0.18489
JUN	0.765377	0.873005	0.571714	1.00204	1.19034	0.635343
HOOK1	1.06478	0.307789	0.176295	0.904844	0.358223	0.137274
TM2D1	1.02368	0.689911	0.360129	0.923804	0.813098	0.517886
INADL	0.928411	0.534816	0.123108	1.00816	0.491594	0.113713
USP1	0.830105	0.515216	0.384094	0.963218	0.568048	0.376755
DOCK7	0.973939	0.520163	0.13942	0.978544	0.54363	0.141504
ATG4C	0.819802	0.321417	0.160413	0.931614	0.460031	0.122505
ITGB3BP	1.02907	0.495419	0.255277	0.948402	0.6316	0.344087
EFCAB7	1.548	0.697971	0.399705	1.07877	0.547935	0.304097
ROR1	0.702423	0.488839	0.0760659	0.946111	0.498682	0.0734895
RAVER2	0.860822	0.547257	0.190289	0.99327	0.564519	0.174959
JAK1	0.786054	0.490317	0.163839	0.93766	0.575394	0.158188
DNAJC6	1.07696	0.624605	0.199264	1.09095	0.857551	0.168176
LEPROT	0.801449	0.517542	0.212004	0.8646	0.582971	0.3147
PDE4B	1.04677	0.550269	0.431483	1.03402	0.589486	0.624758
MIER1	0.92376	0.480297	0.530565	0.901203	0.485982	0.613996
GADD45A	0.697784	1.28103	2.83348	1.10176	2.01862	5.0462
GNG12	0.82527	0.481617	0.142316	0.898782	0.526417	0.226333
WLS	0.906491	0.465464	0.189627	1.13897	0.650743	0.308693
LRRC40	0.853244	0.577077	0.295155	0.915451	0.567367	0.186913
SRSF11	0.982212	0.558923	0.535068	0.909763	0.630609	0.445186
ANKRD13C	0.762065	0.839697	0.519247	0.969753	0.700409	0.355067
ZRANB2	0.817672	0.472668	0.148512	0.996903	0.505038	0.245831
CRYZ	0.884992	0.553433	0.189419	0.935601	0.603393	0.273647
TYW3	1.0437	0.733454	0.437282	1.04762	0.662414	0.457611
RABGGTB	0.905603	0.645582	0.201504	1.02884	0.642211	0.164758
PIGK	0.835264	0.487863	0.185152	0.896695	0.562691	0.296294
AK5	0.797553	0.434495	0.155388	0.911168	0.498861	0.1876
ZZZ3	0.778228	0.670929	0.353908	0.832276	0.500984	0.151264
USP33	0.722855	0.515435	0.187135	0.905241	0.567108	0.22194
FUBP1	0.829773	0.519036	0.176563	0.951536	0.516615	0.232047
DNAJB4	0.83098	0.668383	0.342474	1.18522	0.984745	0.493431
IFI44	1.35984	9.01881	9.4851	1.37934	10.1255	12.8294
LPHN2	0.954883	0.518045	0.220349	0.97437	0.451933	0.173832
ODF2L	1.66199	1.26616	0.349967	0.912333	0.614169	0.106419
PRKACB	0.782277	0.460094	0.115189	0.929907	0.566564	0.169444
RPF1	0.8452	0.502871	0.2089	0.89419	0.667521	0.278644
CTBS	0.86568	0.533895	0.175134	1.06309	0.667329	0.469411
SSX2IP	0.881329	0.640301	0.263554	1.01827	0.637747	0.238403
MCOLN3	0.972692	0.57495	0.280446	1.05049	0.768761	0.387466
C1orf52	0.915551	0.643449	0.916639	1.00286	0.831363	1.23249
CYR61	0.840003	0.238677	0.369857	1.09565	0.335536	0.41056
ZNHIT6	0.911638	0.540406	0.159458	1.01726	0.63225	0.130208
SH3GLB1	0.698887	0.525628	0.311931	0.892122	0.66801	0.398633
LMO4	0.754995	0.625931	0.484292	1.02415	0.928354	0.432126
PKN2	0.923824	0.514217	0.143112	0.969702	0.521697	0.102435
GTF2B	0.711202	0.598382	0.194067	1.0735	0.872909	0.274709
CCBL2	0.856915	0.507111	0.213519	0.925916	0.602866	0.333221
LRRC8C	0.756815	0.480237	0.189738	0.901553	0.689159	0.195762
LRRC8D	0.806118	0.521634	0.139039	0.95077	0.437113	0.102125
ZNF326	0.730356	0.536713	0.205123	1.01931	0.563313	0.220438
ZNF644	1.03116	0.531128	0.240888	0.848495	0.371773	0.122623
CDC7	1.04699	0.480135	0.230413	0.901638	0.512049	0.116707
TGFBR3	0.953987	0.325256	0.186424	1.19866	0.515655	0.311488
GLMN	0.770316	0.535905	0.169345	0.958729	0.783973	0.29345
RPAP2	0.807689	0.33128	0.0669036	0.823722	0.495335	0.10126
FAM69A	0.872778	0.53742	0.140632	0.916349	0.510492	0.172571
TMED5	0.869664	0.451584	0.185576	0.955452	0.610581	0.312209
DR1	0.772575	0.441323	0.205693	0.895147	0.509864	0.136177
BCAR3	0.848897	0.563575	0.287186	1.06858	0.729696	0.322377
DNTTIP2	0.853618	0.543708	0.224311	0.993568	0.598783	0.195659
GCLM	0.770828	0.52086	0.149965	0.903727	0.589181	0.113829
ARHGAP29	0.849822	0.610074	0.164646	0.95328	0.471752	0.0843942
ABCD3	0.877817	0.504344	0.142968	0.985875	0.52471	0.161854
CNN3	0.834463	0.555394	0.220747	0.928947	0.694786	0.397029
ALG14	0.774762	0.53506	0.274061	1.05479	0.689434	0.384121
TMEM56	0.896186	0.751002	0.313504	0.947686	0.577353	0.173928
PTBP2	0.890845	0.426279	0.125424	0.89903	0.483895	0.178451
AGL	0.870202	0.530222	0.125247	0.986924	0.611806	0.162
SLC35A3	0.901894	0.464745	0.155873	0.952224	0.550104	0.214296
HIAT1	0.886005	1.03638	1.40701	1.03253	1.03498	1.48574
SASS6	1.10586	0.501643	0.0834436	0.939338	0.373476	0.10588
TRMT13	0.957976	0.4828	0.216879	1.02027	0.738826	0.342851
RTCA	0.797241	0.628995	0.283024	1.01941	0.653188	0.340546
EXTL2	0.741419	0.507159	0.162233	0.912834	0.451859	0.196565
SLC30A7	0.727161	0.467211	0.110348	0.795795	0.609016	0.216821
CELSR2	1.07935	0.532057	0.153956	1.17818	0.455195	0.157087
DPH5	0.880968	0.544412	0.25551	0.997247	0.621374	0.345885
COL11A1	0.772777	0.497915	0.160069	1.14974	0.636249	0.17337
SLC25A24	0.766484	0.619744	0.23812	0.967214	0.728201	0.309425
PRPF38B	0.997738	0.537941	0.265664	0.989608	0.568697	0.23391
STXBP3	0.772642	0.526939	0.190558	0.840502	0.642835	0.234702
CLCC1	0.79436	0.495427	0.237715	1.11934	0.675876	0.206265
WDR47	1.28988	0.592438	0.538631	1.05823	0.551817	0.460686
SARS	0.867672	0.577232	0.275443	1.01283	0.745747	0.325356
PSRC1	0.742878	0.459189	0.177437	1.0557	0.50617	0.210986
SORT1	0.875093	0.39129	0.104699	1.05954	0.509233	0.159062
PSMA5	0.813215	0.621566	0.299405	1.00944	0.898905	0.557805
GNAI3	0.865101	0.495083	0.209167	0.987535	0.646339	0.219349
CSF1	0.745662	1.64423	0.875242	1.02185	2.43306	1.14473
AHCYL1	0.945574	0.496779	0.133644	1.0326	0.538114	0.186044
STRIP1	0.960485	0.438992	0.077262	1.08105	0.560025	0.122729
RBM15	0.867823	0.379579	0.185341	0.925357	0.409003	0.214987
SLC16A4	0.853232	0.605625	0.331388	0.960427	0.620004	0.392182
LAMTOR5	0.90387	0.557474	0.378119	1.08461	0.842521	0.737198
LRIF1	0.969213	0.62968	0.365906	1.06023	0.605452	0.317716
DRAM2	0.733314	0.455262	0.320137	0.877207	0.553168	0.282753
CEPT1	1.03142	0.543128	0.283295	0.972772	0.590979	0.29058
LRIG2	0.624828	0.554782	0.381163	0.777211	0.523245	0.330657
WDR77	0.75301	0.55767	0.23873	0.965798	0.743081	0.309976
ATP5F1	0.854109	0.42696	0.121896	0.838212	0.622348	0.244373
DDX20	1.0713	0.510251	0.129097	0.976758	0.448395	0.174466
CTTNBP2NL	0.916314	0.268381	0.0662719	1.01552	0.358105	0.118761
CAPZA1	1.55881	0.768429	0.28128	0.861927	0.579937	0.323379
MOV10	0.829897	0.669959	0.233377	1.08241	0.797268	0.321637
RHOC	0.740491	0.610504	0.344517	0.995241	0.824787	0.576076
SLC16A1	0.854229	0.526085	0.232628	1.00364	0.735105	0.558101
MAGI3	1.06201	0.492186	0.0528365	1.25826	0.563782	0.0801771
AP4B1	1.1318	0.526757	0.14628	1.13699	0.660745	0.130606
HIPK1	0.775989	0.555109	0.16291	0.999227	0.520711	0.172711
TRIM33	0.867724	0.529669	0.164947	0.959079	0.487228	0.169206
CSDE1	0.850225	0.476945	0.233575	0.954491	0.563635	0.246376
VANGL1	0.876983	0.56513	0.237929	0.990417	0.650487	0.306345
ATP1A1	0.905687	0.507963	0.200737	1.19861	0.674785	0.342735
CD58	0.98879	0.549647	0.135198	0.872414	0.619456	0.176849
PTGFRN	0.842647	0.493547	0.105482	1.20384	0.599881	0.085614
TTF2	0.863592	0.434345	0.131881	1.05463	0.504766	0.127967
MAN1A2	0.677839	0.696136	0.419929	1.03646	0.597246	0.320393
GDAP2	0.833977	0.388877	0.103392	0.994918	0.629499	0.13878
WARS2	0.725555	0.375752	0.0987963	0.912605	0.603999	0.12787
PHGDH	0.735895	0.664418	0.430983	0.992472	0.860328	0.670425
NOTCH2	1.03016	0.459057	0.131189	1.01947	0.497618	0.153014
LIX1L	0.83216	0.470165	0.173403	1.07558	0.675893	0.312785
PEX11B	0.827378	0.393975	0.161856	1.0418	0.523405	0.18222
PIAS3	0.766466	0.426157	0.17828	1.00174	0.47448	0.173501
POLR3C	0.875657	0.517596	0.141086	1.01141	0.604952	0.220742
RNF115	0.76258	0.53349	0.199922	0.951116	0.603825	0.221465
PDIA3P	0.862425	0.451763	0.147248	0.914429	0.576548	0.308087
CHD1L	0.858081	0.628026	0.294121	1.01277	0.676566	0.282623
ACP6	0.812891	0.578527	0.342368	1.12151	0.553409	0.221599
HIST2H2AB	0.743072	0.567779	0.276119	1.07627	1.50233	0.719619
BOLA1	0.813782	0.437713	0.159053	0.951896	0.477993	0.158449
SF3B4	0.740826	0.546289	0.237451	1.08676	0.67432	0.275216
OTUD7B	0.72811	0.537868	0.127317	0.989496	0.613982	0.18324
VPS45	0.764904	0.47321	0.169725	0.97506	0.560657	0.250531
ANP32E	0.931251	0.593687	0.344937	1.08556	0.685887	0.378133
APH1A	0.842173	0.710754	0.494435	1.01857	0.710776	0.422685
PRPF3	0.871156	0.619253	0.25583	1.02103	0.692977	0.343364
TARS2	0.666	0.332445	0.144343	1.12851	0.521292	0.216772
MCL1	0.976024	0.575005	0.388031	1.20581	0.805136	0.541563
GOLPH3L	0.837084	0.361044	0.26042	0.939346	0.489038	0.558664
CTSS	0.82488	0.760508	0.486483	0.985321	0.900603	0.653583
ARNT	0.99708	0.409332	0.102812	0.950624	0.397141	0.0857017
SETDB1	0.992901	0.53397	0.15016	1.02008	0.578805	0.248178
CERS2	0.770996	0.538464	0.265166	0.929263	0.613365	0.349483
C1orf56	0.707475	0.411028	0.116085	1.05414	0.51984	0.182638
CDC42SE1	0.677769	0.66771	0.442188	0.965133	0.938798	0.65483
MLLT11	0.71943	0.444678	0.300464	1.00993	0.688452	0.552189
SCNM1	0.994373	0.566223	0.38559	1.03427	0.797913	0.354787
VPS72	0.702869	0.48084	0.388934	0.977573	0.709237	0.432849
ZNF687	0.771339	0.367223	0.133084	1.06033	0.362293	0.112869
PI4KB	0.888053	0.668573	0.241629	0.944457	0.58831	0.191849
RFX5	0.82474	0.668201	0.230621	0.944577	0.571484	0.168117
PSMB4	0.748916	0.581777	0.331293	0.981979	0.804342	0.569069
POGZ	1.02731	0.577982	0.258332	1.09412	0.665085	0.27648
TUFT1	0.950392	0.793245	0.513628	1.26466	1.02829	0.636749
SNX27	0.981697	0.47366	0.221371	1.00294	0.655171	0.212276
MRPL9	0.674577	0.485731	0.324844	1.0593	0.709658	0.398397
TDRKH	0.827435	0.330722	0.0555726	1.14605	0.581395	0.179906
S100A10	0.86062	0.606641	0.392278	0.988676	0.730429	0.636489
S100A11	0.803756	0.653814	0.186729	1.01133	0.778367	0.772641
S100A6	0.715075	0.561845	0.438399	0.99245	0.896466	0.870292
S100A4	0.785415	0.575517	0.370912	1.0496	0.813512	0.625633
S100A3	0.685231	0.558079	0.42602	0.808158	0.821546	0.643755
S100A16	0.81203	0.512408	0.260485	0.977464	0.699987	0.392142
S100A13	0.879787	0.668445	0.595547	1.16717	1.0406	1.07721
CHTOP	0.826147	0.548258	0.16447	0.996503	0.668668	0.264694
SNAPIN	0.74434	0.497906	0.218437	0.94988	0.698331	0.384085
ILF2	0.801228	0.593239	0.37412	1.03037	0.774057	0.716599
INTS3	0.94267	0.502961	0.100877	1.05628	0.530867	0.151881
GATAD2B	0.792512	0.4004	0.062056	0.848821	0.517292	0.153866
DENND4B	1.38531	0.853903	0.387309	1.19343	0.721382	0.288741
CREB3L4	0.698253	0.550245	0.300617	1.04024	0.668478	0.295401
JTB	0.889381	0.701121	0.986207	0.937597	0.794386	0.608051
C1orf43	0.806714	0.769627	0.535608	0.93776	0.661871	0.396703
UBAP2L	0.883539	0.575242	0.241395	0.949072	0.685301	0.268012
HAX1	0.701561	0.743521	0.651193	0.914391	0.794732	0.598515
ATP8B2	1.27243	1.05765	0.506378	1.15161	0.583902	0.324356
UBE2Q1	0.774653	0.689859	0.738068	0.98805	0.867397	0.686811
ADAR	0.969502	0.832445	0.336266	1.08539	1.15411	0.419929
PMVK	0.698915	0.522247	0.304436	1.14414	0.840362	0.450054
PBXIP1	0.750629	0.434874	0.213699	1.23898	0.65748	0.858443
THBS3	1.3228	0.769926	0.331901	0.931513	0.485026	0.155872
PYGO2	0.775857	0.491287	0.264974	0.907239	0.697113	0.620208
SHC1	0.993137	0.766626	0.451308	1.02906	0.693677	0.291009
FLAD1	0.874773	0.506684	0.283071	1.12067	0.695636	0.346515
ADAM15	0.885769	0.643214	0.346122	1.00928	0.687519	0.346451
EFNA1	0.404835	0.431002	0.124982	0.664289	0.754578	0.208607
SLC50A1	0.710102	0.518919	0.290213	0.87443	0.679281	0.454616
DPM3	0.738779	0.504166	0.349499	0.974829	0.780939	0.534508
KRTCAP2	0.75786	0.548906	0.340547	0.877391	0.622459	0.573347
GON4L	0.963003	0.554206	0.301653	1.13325	0.693376	0.186059
MTX1	0.743902	0.61664	0.32962	1.08082	0.936114	0.455769
GBA	0.886414	0.497039	0.126617	1.10041	0.528144	0.17388
FAM189B	1.05946	1.23701	0.944862	1.13117	0.674117	0.545925
SCAMP3	0.768552	0.586911	0.334563	0.981186	0.70473	0.441012
FDPS	0.960763	0.693999	0.419292	1.08414	0.693622	0.354679
RUSC1	0.775184	0.775098	0.577051	0.960717	0.946314	0.60931
ASH1L	1.02073	0.701193	0.376247	1.05736	0.66339	0.184235
DAP3	0.768246	0.563467	0.223152	1.01564	0.713395	0.359869
KIAA0907	0.872982	0.55874	0.404596	0.905814	0.639656	0.492973
ARHGEF2	0.761807	0.618322	0.229299	0.934778	0.545237	0.3698
SSR2	0.745865	0.48892	0.276154	0.950319	0.707559	0.437863
LAMTOR2	0.68288	0.483544	0.277071	1.09337	0.786027	0.558696
LMNA	0.763889	0.505507	0.220744	1.08665	0.690843	0.397704
SLC25A44	1.05762	0.785186	0.275494	1.05275	0.738489	0.31253
SMG5	0.780295	0.750359	0.259163	0.803099	0.582796	0.147336
C1orf85	0.805307	0.524686	0.251855	1.00543	0.600923	0.286131
CCT3	0.839767	0.509336	0.23327	0.985866	0.70033	0.383505
MEF2D	0.919822	0.265926	0.131894	1.10579	0.267896	0.119964
IQGAP3	0.957105	0.582891	0.159876	1.00194	0.56426	0.159984
APOA1BP	0.875883	0.564921	0.402669	0.918465	0.67229	0.48759
GPATCH4	0.743688	0.554205	0.165046	1.1653	0.791079	0.285265
ISG20L2	0.656199	0.333512	0.154897	1.206	0.532667	0.218481
RRNAD1	0.732634	0.504553	0.235899	0.982724	0.596636	0.238528
MRPL24	0.710252	0.524452	0.273761	0.985704	0.722019	0.569113
HDGF	0.799094	0.573305	0.357026	1.10098	0.72402	0.452851
PRCC	0.905472	0.635963	0.492387	0.998314	0.726341	0.568638
ARHGEF11	0.864201	0.731419	0.0898979	0.950463	0.597372	0.0960201
ETV3	1.5645	1.55308	1.29231	1.63174	1.67788	1.58751
KIRREL	0.787654	0.476551	0.139896	1.05521	0.635056	0.15192
DUSP23	0.756859	0.627739	0.618949	1.1186	0.928867	0.868886
PIGM	0.859118	0.539529	0.105389	1.11898	0.601605	0.218799
PEA15	0.750116	0.645498	0.382862	0.983173	0.821725	0.52502
COPA	0.934443	0.518857	0.134323	0.977969	0.60298	0.189338
NCSTN	0.857766	0.491416	0.205871	1.01876	0.628956	0.266385
PFDN2	0.8146	0.530114	0.448901	0.965669	0.876828	0.850447
NIT1	0.682005	0.357288	0.123345	1.08334	0.519862	0.176021
DEDD	0.952995	0.716504	0.457575	0.935023	0.734801	0.443096
UFC1	0.854411	0.552902	0.331881	1.1418	0.796865	0.550177
PPOX	0.713993	0.453859	0.19584	1.05482	0.637716	0.301121
B4GALT3	0.707182	0.546705	0.402699	0.849726	0.606933	0.365549
NDUFS2	0.792903	0.386233	0.0815513	1.02954	0.564316	0.126882
SDHC	0.74601	0.495822	0.140352	0.826373	0.506793	0.250051
DUSP12	0.93554	0.560564	0.310358	0.978166	0.691468	0.379602
ATF6	0.803248	0.41976	0.131393	0.956758	0.543564	0.19617
UHMK1	0.91875	0.696052	0.291955	0.922668	0.646912	0.297703
UAP1	0.83604	0.735004	0.286447	0.868343	0.600652	0.171766
NUF2	0.794819	0.467621	0.187413	0.961066	0.570705	0.22876
PBX1	1.00763	0.40867	0.106861	1.01962	0.448215	0.111171
MGST3	0.832444	0.591934	0.348743	0.96923	0.749083	0.593382
ALDH9A1	0.807955	0.530165	0.2331	1.05083	0.694231	0.318575
TMCO1	0.919468	0.618803	0.351586	0.98802	0.761373	0.561254
UCK2	0.743638	0.428928	0.13383	0.941166	0.574473	0.115655
POGK	0.763265	0.45701	0.33601	1.01624	0.553945	0.250989
TADA1	0.731733	0.476684	0.0937563	1.14935	0.448933	0.261288
POU2F1	1.05196	0.46801	0.107698	0.928973	0.579911	0.135146
CREG1	0.728054	0.578731	0.286852	0.955078	0.777607	0.560543
MPZL1	0.733039	0.45743	0.107673	1.04971	0.566295	0.226695
MPC2	0.797691	0.559142	0.274092	1.02607	0.744004	0.48484
DCAF6	0.870423	0.611454	0.312487	0.924065	0.536447	0.212993
TIPRL	0.827719	0.557975	0.269747	0.918679	0.707416	0.35047
SFT2D2	0.855707	0.422014	0.0816303	0.91981	0.789868	0.158505
ATP1B1	0.864314	0.476067	0.173573	0.944184	0.580024	0.189189
NME7	0.730938	0.498588	0.255634	0.928117	0.599543	0.256027
BLZF1	0.851152	0.874093	0.374517	0.961895	1.08267	0.508863
SLC19A2	1.07054	0.532829	0.313787	1.01714	0.526227	0.351096
METTL18	1.1489	0.782798	0.506788	1.03664	0.614097	0.451103
C1orf112	0.742014	0.401596	0.126553	0.906783	0.522817	0.135626
SCYL3	0.918135	0.554627	0.465872	0.957804	0.757917	0.453656
KIFAP3	0.959506	0.640839	0.19245	0.958414	0.635517	0.188031
GORAB	0.933243	0.801955	0.759691	1.00692	0.769136	0.728009
METTL13	0.90684	0.438268	0.170238	1.1696	0.569836	0.203289
PIGC	0.790204	0.363519	0.12552	1.05244	0.526912	0.138672
SUCO	1.03477	0.627029	0.466535	0.987923	0.470643	0.357083
PRDX6	0.743245	0.559022	0.214381	0.95194	0.668668	0.361203
KLHL20	0.904388	0.572296	0.171086	1.07308	0.690639	0.312385
CENPL	1.00801	0.593704	0.164468	0.893104	0.608047	0.160258
DARS2	0.844365	0.436296	0.153445	1.06516	0.535398	0.195763
RC3H1	0.695558	0.630166	0.340789	0.866951	0.720197	0.498695
RABGAP1L	0.962683	0.41966	0.0810754	0.940583	0.516553	0.118466
MRPS14	0.902206	0.618775	0.318867	1.06532	0.755712	0.448124
RFWD2	0.955941	0.448277	0.197465	0.923435	0.459565	0.085542
CEP350	1.11875	0.663658	0.417305	1.03724	0.634442	0.43217
RASAL2	0.911085	0.519516	0.102541	0.992294	0.553944	0.0729392
RALGPS2	0.846674	0.463246	0.0808828	0.917107	0.448964	0.0904717
FAM20B	0.772434	0.487963	0.152834	1.04759	0.380073	0.112345
TOR3A	0.849092	0.537435	0.329549	1.0537	0.666779	0.430028
ABL2	0.87139	0.464537	0.107637	0.992574	0.512363	0.167098
SOAT1	0.940101	0.513047	0.180999	1.00312	0.611056	0.320646
TOR1AIP2	0.935507	0.557555	0.30844	1.03549	0.862899	0.559833
TOR1AIP1	0.92681	0.596489	0.37255	0.886715	0.69157	0.390228
QSOX1	0.739174	0.5393	0.192636	1.08396	0.779763	0.254581
ACBD6	0.970562	0.580703	0.27302	0.966373	0.634581	0.261299
XPR1	0.87627	0.522051	0.169179	1.01891	0.483289	0.184748
IER5	0.751873	0.529316	0.671715	1.04806	0.773918	1.04538
DHX9	0.863933	0.560908	0.19042	1.06527	0.613196	0.220988
LAMC1	0.872201	0.453374	0.0981927	1.05563	0.533685	0.131406
LAMC2	0.788172	0.492081	0.304672	0.824438	0.763187	0.436797
SMG7	0.819025	0.660165	0.246664	0.856692	0.553014	0.168795
RGL1	0.680234	0.539712	0.0932452	1.31006	0.475163	0.112292
TSEN15	0.8699	0.564319	0.451606	0.932441	0.777902	0.433327
TRMT1L	1.05711	0.471614	0.20844	1.08416	0.560799	0.440169
IVNS1ABP	1.02918	0.606769	0.171382	1.06774	0.345028	0.0966052
TPR	0.902832	0.497527	0.120259	0.985166	0.523768	0.133219
PTGS2	1.06883	0.622786	0.132509	1.17718	0.712091	0.146638
PLA2G4A	0.863123	0.509067	0.193562	1.0037	0.73791	0.295499
RGS2	1.1414	0.477878	0.809379	1.08269	0.458105	1.01511
UCHL5	0.914841	0.480222	0.193782	0.98791	0.520601	0.177448
TROVE2	0.811136	0.466275	0.183848	0.967476	0.66968	0.31081
GLRX2	0.755263	0.489177	0.221352	0.885793	0.687179	0.448418
CDC73	0.866229	0.510098	0.152034	0.940213	0.579902	0.149466
CFH	0.987635	0.500997	0.147342	0.961313	0.614694	0.245081
ASPM	0.972507	0.522292	0.157192	0.97518	0.428821	0.0709619
ZBTB41	0.829294	0.623291	0.296649	1.0283	0.669524	0.269897
NEK7	0.937345	0.593283	0.456528	0.839758	0.650297	0.374693
NR5A2	0.754312	0.461523	0.142416	0.834024	0.35965	0.209867
ZNF281	0.9647	0.345164	0.272293	0.97278	0.34706	0.223735
CAMSAP2	0.835513	0.646847	0.235209	0.940531	0.558049	0.17195
C1orf106	1.00864	0.558573	0.25659	1.00314	0.581493	0.274486
TMEM9	0.822182	0.505369	0.326065	1.0468	0.776531	0.52872
PHLDA3	0.828469	0.593598	0.202145	1.0278	0.765159	0.290296
IPO9	0.862265	0.464662	0.144495	1.07414	0.553404	0.17079
SHISA4	0.567504	0.618361	0.367277	0.92032	0.653554	0.412042
TIMM17A	0.801282	0.494011	0.383911	0.941201	0.683112	0.596772
RNPEP	0.775653	0.520174	0.229804	1.01593	0.613277	0.279318
ELF3	0.702824	0.283719	0.167826	1.00741	0.389923	0.321551
ARL8A	0.844315	0.497535	0.174036	1.02164	0.624467	0.192574
UBE2T	0.932244	0.476981	0.232205	0.981232	0.560641	0.271116
KDM5B	0.94454	0.609426	0.3653	0.935856	0.637356	0.507865
RABIF	0.809142	0.511488	0.253934	1.03891	0.883333	0.421627
ADIPOR1	1.05545	0.905709	0.818675	1.04347	0.631618	0.437266
CYB5R1	0.625362	0.443585	0.182059	0.925813	0.574143	0.288104
BTG2	1.67814	1.38994	5.65173	1.29004	1.18309	4.40858
ATP2B4	0.833647	0.439597	0.226532	1.13329	0.656866	0.208561
SOX13	1.05193	0.710058	0.147492	0.992891	0.670601	0.167748
PLEKHA6	0.908641	0.577489	0.157052	1.01712	0.685857	0.134499
PPP1R15B	0.825829	0.588799	0.175915	0.916129	0.536602	0.215881
RBBP5	0.802818	0.464541	0.2168	1.04314	0.666497	0.324891
DSTYK	0.790208	0.410251	0.129992	1.05688	0.510379	0.232283
NUAK2	0.808137	0.519713	0.209096	1.03728	0.746178	0.323519
NUCKS1	0.768766	0.467898	0.210985	1.10664	0.653783	0.350202
IKBKE	0.945854	0.923231	0.515031	0.917575	0.724093	0.25618
EIF2D	0.698607	0.64372	0.41242	0.923085	0.601343	0.286502
DYRK3	0.663629	0.387066	0.331936	0.946581	0.622879	0.383434
MAPKAPK2	0.782496	0.691656	0.20509	0.945926	0.542736	0.141813
YOD1	0.991105	0.376586	0.867986	0.842427	0.375	0.592264
PFKFB2	0.766019	0.484718	0.1497	0.988231	0.628909	0.328514
CD55	0.836826	0.504501	0.225386	0.820687	0.529403	0.286676
CD46	0.880983	0.536034	0.171906	0.940698	0.606484	0.311978
LAMB3	0.742258	0.475488	0.115182	0.918395	0.596328	0.164049
DIEXF	0.661082	0.339033	0.174805	1.01672	0.462395	0.217417
TRAF5	1.31084	0.44288	0.155159	1.11915	0.379468	0.0822537
SLC30A1	0.647521	0.47846	0.458677	0.796065	0.560732	0.614013
LPGAT1	0.790124	0.559779	0.287368	1.06957	0.716504	0.243933
INTS7	0.780596	0.522015	0.139955	0.837144	0.633032	0.113531
PPP2R5A	0.903688	0.595884	0.310704	0.941768	0.579207	0.2669
NENF	0.602103	0.579623	0.739158	0.99744	0.908886	0.911036
NSL1	0.77757	0.451113	0.249143	0.895598	0.551768	0.222433
TATDN3	0.91095	0.570117	0.292527	0.989942	0.510666	0.2546
FLVCR1	0.700646	0.514407	0.297933	1.04697	0.623839	0.372559
ANGEL2	0.858504	0.703397	0.372422	0.929066	0.683871	0.297308
PTPN14	0.820361	0.624826	0.141949	1.09377	0.726338	0.175848
CENPF	0.84255	0.376568	0.0661061	1.05571	0.421867	0.0850976
KCTD3	0.78866	0.58042	0.190493	1.06903	0.610224	0.213402
GPATCH2	0.85048	0.453819	0.16475	1.05988	0.530063	0.198802
RRP15	0.754361	0.521341	0.230088	1.05692	0.783772	0.365169
TGFB2	0.774029	0.413307	0.0936494	0.982278	0.541723	0.124478
LYPLAL1	0.88334	0.553051	0.15662	0.937768	0.600304	0.250778
EPRS	0.905898	0.554498	0.249583	1.0206	0.654964	0.360467
BPNT1	0.750768	0.545993	0.268204	0.977139	0.648702	0.486222
IARS2	0.845796	0.489659	0.182622	1.00691	0.578299	0.231922
42065	0.833872	0.506545	0.320865	0.867884	0.693031	0.319592
HHIPL2	0.911288	0.494013	0.134965	1.14255	0.725735	0.449602
DNAH14	0.820363	0.61032	0.361781	0.974093	0.542633	0.153694
MIA3	1.02561	0.446645	0.160807	1.05703	0.472618	0.258798
BROX	0.837571	0.545223	0.210452	1.01863	0.55128	0.362507
CAPN2	0.780584	0.6117	0.278008	1.00234	0.752571	0.285899
FBXO28	0.848283	0.521632	0.440195	0.976251	0.67545	0.47466
DEGS1	0.852429	0.543318	0.313516	0.907047	0.653477	0.423114
NVL	1.05034	0.64731	0.413915	1.04203	0.676993	0.345469
CNIH4	0.923631	0.572832	0.292212	0.920938	0.654936	0.417652
WDR26	0.848936	0.560561	0.219245	0.934046	0.527968	0.179258
LBR	0.886239	0.409243	0.154178	1.10589	0.514097	0.196497
ENAH	0.848504	0.579235	0.229283	1.03081	0.6826	0.156851
EPHX1	0.754843	0.452715	0.188294	1.04868	0.688011	0.373153
PYCR2	0.859513	0.554529	0.315687	0.952024	0.674065	0.423408
SDE2	0.850989	0.583448	0.940848	1.16471	0.917325	1.58931
ACBD3	0.837067	0.443334	0.363029	0.97886	0.5776	0.630988
LIN9	0.883755	0.421794	0.122184	0.98492	0.552152	0.254592
OBSCN	0.958166	0.785022	0.173682	0.911623	0.514542	0.0843917
PARP1	0.911626	0.540383	0.114177	1.05918	0.547592	0.162506
ADCK3	0.740912	0.352513	0.0606165	0.969545	0.425263	0.177225
CDC42BPA	1.07101	0.673967	0.128027	1.00317	0.4838	0.0761211
JMJD4	0.785898	0.4198	0.149112	1.01823	0.597566	0.207701
SNAP47	0.864905	0.531121	0.143406	0.947005	0.650196	0.159828
ARF1	0.742394	0.526775	0.321495	1.02983	0.707482	0.528576
C1orf35	0.856689	0.544875	0.12847	0.905399	0.614051	0.201766
MRPL55	0.824201	0.520365	0.280996	1.00803	0.748734	0.37673
TRIM11	0.604131	0.482872	0.527364	0.924631	0.625551	0.796605
RNF187	0.734401	0.572588	0.38807	1.1117	0.921525	0.528422
RAB4A	0.895019	0.729993	0.632058	0.973373	0.725143	0.423835
NUP133	0.853417	0.505163	0.10447	1.0539	0.5344	0.176496
ABCB10	0.527871	0.43072	0.177712	1.16145	0.68466	0.328516
TAF5L	0.797699	0.493708	0.714265	0.836616	0.485105	0.376461
URB2	0.896966	0.438994	0.166273	0.923716	0.380923	0.230011
COG2	0.85986	0.517981	0.198673	0.943343	0.604291	0.29855
C1orf198	0.706953	0.634242	0.329109	1.15875	0.790428	0.361146
TTC13	0.738244	0.499961	0.179399	1.03229	0.688189	0.236753
ARV1	0.806177	0.518988	0.237661	0.919865	0.684912	0.313273
FAM89A	0.682045	0.520871	0.190302	1.11145	0.804216	0.330192
PCNXL2	1.21956	1.25672	1.03825	0.966217	0.572271	0.205361
C1orf131	0.909412	0.529845	0.546558	0.900433	0.621084	0.731067
GNPAT	0.915787	0.600352	0.340379	0.954586	0.609775	0.259479
EXOC8	0.794783	0.523016	0.299115	1.00917	0.555168	0.556412
SPRTN	0.73021	0.378141	0.194371	0.870621	0.595677	0.259667
EGLN1	0.680599	0.497973	0.246692	0.818355	0.545943	0.198626
TSNAX	0.910875	0.575642	0.148262	1.00592	0.629272	0.307083
SIPA1L2	0.627812	0.733151	0.323679	0.9884	0.605585	0.150425
NTPCR	0.850974	0.503443	0.269417	0.976751	0.683332	0.371576
KIAA1804	0.943775	0.618963	0.358456	1.10858	0.497692	0.348576
SLC35F3	0.676663	0.319849	0.0924404	1.03785	0.582428	0.106485
LYST	1.03463	0.791042	0.411304	0.890661	0.647806	0.37452
COA6	0.722664	0.479027	0.187176	0.99084	0.706849	0.455342
TARBP1	0.893705	0.61486	0.225591	0.968387	0.496256	0.153488
IRF2BP2	0.907907	0.297628	0.158141	1.14282	0.282226	0.161639
RBM34	0.767461	0.45333	0.280042	0.961879	0.586073	0.400304
ARID4B	0.820663	0.698106	0.255945	0.960396	0.845834	0.315407
GGPS1	0.728313	0.609071	0.421538	0.921009	0.632187	0.313794
TBCE	0.757379	0.516513	0.225814	0.947867	0.743389	0.336018
B3GALNT2	1.2175	0.86816	0.846879	1.05809	0.70095	0.496469
GPR137B	0.572536	0.481036	0.260293	1.03057	0.662246	0.298414
LGALS8	0.857156	0.602675	0.231717	0.894367	0.618797	0.257589
HEATR1	0.875476	0.507986	0.123097	0.922312	0.486686	0.118337
MTR	0.914324	0.418623	0.0959061	1.0192	0.464536	0.0899004
FH	0.877429	0.514849	0.130459	0.979053	0.622217	0.169794
OPN3	0.908992	0.616414	0.443325	0.938856	0.723343	0.486771
EXO1	0.793793	0.48965	0.14765	0.992554	0.504485	0.0825654
PLD5	1.05679	0.629973	0.226688	0.880323	0.471966	0.197944
SDCCAG8	0.891142	0.390537	0.267695	0.939894	0.582325	0.31561
AKT3	0.993829	0.946935	0.432871	0.943457	0.564249	0.171735
ADSS	0.831189	0.525904	0.205206	0.900616	0.534159	0.223378
HNRNPU	0.876986	0.528776	0.15022	1.0946	0.59406	0.195786
SMYD3	0.876549	0.618375	0.220699	0.950668	0.656587	0.337243
TFB2M	0.712101	0.433137	0.219734	0.801913	0.572216	0.311581
CNST	0.842744	0.59734	0.197083	0.98208	0.67796	0.212988
SCCPDH	0.791481	0.530428	0.263518	0.954216	0.71184	0.389998
ZNF496	0.884926	0.541219	0.258019	1.0437	0.490585	0.188174
SH3BP5L	1.41382	0.864252	0.642857	0.943298	0.740763	0.569251
ZNF672	0.883591	0.683441	0.203558	1.01205	0.515205	0.091003
ZNF692	1.08315	0.387597	0.386113	0.926241	0.563197	0.474347
PGBD2	0.841157	0.491559	0.325676	1.14913	0.638447	0.380663
DIP2C	1.02284	0.516823	0.154415	0.967924	0.412695	0.0651153
GTPBP4	0.853089	0.440833	0.119305	0.985586	0.561373	0.168174
IDI1	0.985287	0.484927	0.204495	0.966643	0.495967	0.261064
PFKP	0.791706	0.483372	0.147646	1.01168	0.728358	0.236537
KLF6	1.49922	1.24558	0.461817	1.73369	1.62188	0.396854
AKR1C2	0.922007	0.448595	0.112616	0.809843	0.385467	0.177573
NET1	0.883659	0.568572	0.418214	1.08819	0.664676	0.494809
ASB13	0.844942	0.5402	0.457596	1.11282	0.668821	0.612159
FAM208B	0.763172	0.582681	0.23568	0.983246	0.623599	0.194351
GDI2	0.880696	0.565455	0.172009	0.974408	0.679756	0.284944
FBXO18	0.900356	0.544215	0.251601	1.00119	0.662069	0.333553
RBM17	0.963955	0.640044	0.344137	1.09615	0.805763	0.286655
PFKFB3	0.833989	0.507842	0.121755	1.05267	0.777458	0.200411
KIN	0.784112	0.698864	0.296724	0.928334	0.63031	0.226805
ATP5C1	0.854612	0.555078	0.195646	0.894662	0.689041	0.379151
USP6NL	0.934055	0.674959	0.269195	1.0438	0.532573	0.198615
PROSER2	0.610013	0.454663	0.442614	1.00064	0.590453	0.736401
UPF2	0.908322	0.632392	0.200207	1.04869	0.700643	0.309022
DHTKD1	0.954798	0.485905	0.162799	1.07752	0.523456	0.184237
SEC61A2	0.757496	0.440043	0.134452	1.1084	0.585198	0.296155
NUDT5	0.691052	0.507083	0.23876	0.987672	0.659238	0.367165
CDC123	0.99972	0.552309	0.248868	0.991959	0.66146	0.338693
OPTN	0.660022	0.628215	0.442488	0.816451	0.781504	0.403127
MCM10	0.867278	0.386478	0.124403	1.14136	0.50918	0.151865
PHYH	0.804974	0.600954	0.297227	0.914236	0.681183	0.480875
PRPF18	0.796909	0.366853	0.111705	0.887383	0.519113	0.120643
FAM107B	0.712416	0.467464	0.165132	0.859775	0.527118	0.177262
HSPA14	0.632889	0.455083	0.307563	1.02179	0.515602	0.401833
HSPA14	0.795056	0.517126	0.340032	0.977418	0.752347	0.429171
RPP38	0.892269	0.414171	0.319631	0.923459	0.531649	0.290313
NMT2	0.857336	0.523061	0.226796	1.11458	0.596536	0.291248
FAM171A1	1.0618	0.806975	0.576418	1.07723	0.665704	0.252717
FAM188A	0.873529	0.515901	0.243314	1.02184	0.624041	0.274959
PTER	0.75255	0.532249	0.164369	1.02596	0.589402	0.248739
RSU1	0.908231	0.571421	0.263612	0.995352	0.735521	0.441716
VIM	0.760438	0.628644	0.371607	1.06308	0.814127	0.62027
PTPLA	0.867625	0.607315	0.447672	0.970277	0.706103	0.510187
STAM	0.902337	0.44616	0.138386	1.0515	0.527378	0.133006
ARL5B	0.939883	0.707076	0.474784	0.944095	0.733049	0.648776
DNAJC1	0.949855	0.476599	0.165644	0.971261	0.710117	0.289649
PIP4K2A	0.789469	0.62202	0.179821	0.918	0.436737	0.0984129
MSRB2	0.765599	0.538858	0.422632	1.07248	0.902418	0.68546
OTUD1	1.40215	2.49354	2.62492	1.88852	2.57581	3.06356
KIAA1217	0.791359	0.86098	0.419515	0.834587	0.776143	0.28472
PRTFDC1	0.775219	0.516841	0.188871	0.842371	0.573999	0.199185
SVIL	1.15759	0.544346	0.112417	1.08453	0.620859	0.1406
THNSL1	0.918245	0.31063	0.202823	1.14203	0.459826	0.424354
ABI1	0.685815	0.556633	0.207239	0.896718	0.54298	0.19683
YME1L1	0.818303	0.570756	0.295303	0.957623	0.64381	0.418698
MASTL	0.898776	0.626312	0.373085	0.961674	0.747792	0.325146
RAB18	0.79715	0.544899	0.194333	0.979543	0.643059	0.240731
WAC	0.807213	0.597086	0.309339	0.86383	0.558693	0.26485
BAMBI	0.992105	1.28977	0.823871	1.20196	1.59861	0.837777
KIAA1462	0.67824	1.02704	0.487311	0.761178	0.881458	0.36562
MTPAP	0.682952	0.455726	0.289405	0.886912	0.603236	0.277411
ZEB1	0.616138	0.470392	0.228076	0.983228	0.499564	0.19933
ARHGAP12	0.863257	0.449173	0.239221	0.914851	0.52884	0.130298
KIF5B	0.853229	0.511129	0.137631	0.975774	0.535481	0.164509
EPC1	0.668623	0.607711	0.697321	0.992138	0.626207	0.51951
ITGB1	0.878393	0.492111	0.142258	0.99403	0.581061	0.226181
NRP1	0.933198	0.518284	0.243012	1.2131	0.768038	0.361796
CREM	0.806696	0.715199	0.654298	0.946396	0.891416	0.581045
CCNY	1.29523	0.734033	0.281655	0.937435	0.460518	0.129071
FZD8	1.22323	0.423678	0.33341	1.13851	0.431743	0.339182
ERCC6	0.81798	0.477959	0.171173	1.00252	0.502628	0.155432
BMS1	0.972352	0.560825	0.235603	1.09229	0.69237	0.310068
CSGALNACT2	0.928336	0.633817	0.341594	0.889271	0.571339	0.206592
HNRNPF	0.805729	0.488444	0.318258	1.08483	0.731496	0.686169
ZNF32	0.861304	0.61273	0.693272	1.05409	0.605466	0.496889
GPRIN2	0.857387	0.585427	0.134283	1.03062	0.509689	0.157987
NPY4R	0.963149	0.644265	0.184717	1.05247	0.409258	0.101234
MAPK8	0.648777	0.50545	0.136551	0.853203	0.609781	0.150347
TIMM23	0.918597	0.518138	0.212491	0.87215	0.495322	0.154571
SGMS1	0.754721	0.700833	0.248317	0.912418	0.818141	0.244805
ANK3	1.055	0.69523	0.158867	1.00039	0.370597	0.110898
CSTF2T	0.887456	0.630715	0.18811	1.07582	0.661688	0.280245
DKK1	0.705541	0.246503	0.064352	0.821488	0.36423	0.0898413
ZWINT	0.766257	0.541118	0.257005	1.03703	0.775763	0.361849
UBE2D1	0.784778	0.577465	0.19944	1.01793	0.589634	0.313427
TFAM	0.741587	0.465389	0.230769	0.919958	0.623065	0.345131
BICC1	0.814978	0.4542	0.103978	1.02413	0.494628	0.0975494
CCDC6	0.896243	0.706451	0.405414	1.04386	0.866843	0.489905
CDK1	0.799733	0.512849	0.157335	0.911877	0.595039	0.208299
RHOBTB1	1.09949	0.485878	0.114117	1.22935	0.399934	0.174359
ARID5B	1.04273	0.189297	0.0867465	1.01136	0.243463	0.103415
ADO	0.817374	0.6124	0.671898	1.05951	0.68095	0.648341
JMJD1C	1.03677	0.595181	0.212394	1.15357	0.524246	0.225048
REEP3	0.800781	0.610448	0.324649	0.927528	0.645123	0.351994
DNAJC12	0.670784	0.381881	0.194146	1.01465	0.650762	0.27023
SIRT1	0.839082	0.509022	0.208796	0.906794	0.550416	0.226754
HERC4	0.914584	0.507986	0.256245	0.927863	0.519879	0.16826
HNRNPH3	0.954173	0.573237	0.397757	1.16326	0.707148	0.734366
RUFY2	0.831661	0.499773	0.171285	0.960686	0.522195	0.154134
SLC25A16	0.855171	0.617748	0.230165	0.851183	0.538983	0.198926
CCAR1	1.02401	0.594018	0.332596	1.01268	0.663887	0.312891
DDX21	0.780201	0.55458	0.238086	0.977941	0.639321	0.38452
KIAA1279	0.831196	0.479994	0.226576	1.00406	0.668696	0.360865
SRGN	0.745217	0.585466	0.394403	0.919236	0.789791	0.825506
VPS26A	0.988501	0.52417	0.167056	0.87792	0.534743	0.248648
SUPV3L1	0.877246	0.649954	0.47908	1.01878	0.642056	0.691989
HKDC1	0.860092	0.543389	0.161321	1.16413	0.888409	0.288166
HK1	0.864553	0.62075	0.278506	1.0361	0.893371	0.387567
TSPAN15	0.810467	0.562343	0.267452	0.984865	0.613338	0.214739
C10orf35	0.672544	0.424683	0.0498846	0.795922	0.592868	0.165283
H2AFY2	0.705452	0.361634	0.153887	1.04272	0.511639	0.169529
AIFM2	0.779651	0.479385	0.172514	0.975591	0.621623	0.268215
TYSND1	0.884898	0.561962	0.237967	1.06139	0.734366	0.260392
PPA1	1.12901	0.832881	0.527779	0.989051	0.996616	0.702073
SGPL1	0.78696	0.530507	0.213557	0.910754	0.620064	0.209349
PCBD1	0.782885	0.478013	0.260826	1.00152	0.713719	0.483497
SLC29A3	0.844257	0.311181	0.0573857	0.942455	0.43157	0.0788532
C10orf54	0.651275	0.46362	0.191347	0.860092	0.469178	0.169449
PSAP	0.795553	0.524438	0.243122	1.09853	0.788076	0.410445
CHST3	0.762227	0.601248	0.233927	1.11025	0.754059	0.264903
ASCC1	0.852136	0.471001	0.15661	1.10281	0.536142	0.189516
DDIT4	0.638194	0.803606	1.46556	0.878026	1.17819	2.31792
DNAJB12	0.787053	0.456729	0.154807	0.979225	0.627004	0.166509
USP54	1.32646	0.431129	0.160322	1.19494	0.47251	0.0652134
MICU1	0.90404	0.517804	0.16729	0.975057	0.594545	0.264436
MCU	0.86495	0.43613	0.10408	0.923218	0.471962	0.0995237
P4HA1	0.84087	0.444032	0.231223	0.985478	0.519144	0.275503
ECD	0.92702	0.499685	0.136989	0.919819	0.560646	0.198068
MRPS16	0.908006	0.516544	0.154116	1.00987	0.580988	0.235593
ANXA7	0.803606	0.530591	0.199718	0.979528	0.673223	0.284261
PPP3CB	0.620865	0.548247	0.164026	0.948305	0.576756	0.194371
SEC24C	0.858073	0.491776	0.190026	0.931268	0.573462	0.294533
FUT11	0.654098	0.368858	0.273828	1.06713	0.711655	0.83684
KAT6B	0.960489	0.462087	0.177195	0.952411	0.31715	0.103963
CHCHD1	0.700335	0.573897	0.492419	1.00717	0.841087	0.776591
ZSWIM8	0.999462	0.447708	0.197562	0.919221	0.54486	0.300193
CAMK2G	0.895909	0.545505	0.141463	0.850086	0.56205	0.175398
PLAU	0.701587	0.458082	0.376974	0.967396	0.634622	0.641352
VCL	0.813307	0.547082	0.161877	0.924819	0.653131	0.209924
AP3M1	0.852741	0.462509	0.132849	0.948649	0.553473	0.185456
ADK	0.762159	0.563241	0.256901	0.963458	0.6529	0.346279
SAMD8	0.819869	0.501755	0.18062	0.938057	0.538059	0.185704
COMTD1	0.708925	0.526436	0.288459	1.00475	0.830069	0.421258
ZNF503	0.836327	0.979677	1.07109	1.18132	1.26211	1.34395
KCNMA1	1.09875	0.560642	0.24785	1.06444	0.585145	0.245487
DLG5	0.890696	0.609432	0.112296	1.10834	0.555099	0.105978
POLR3A	0.73797	0.509736	0.20574	1.05242	0.685228	0.250282
ZMIZ1	0.942575	0.442241	0.124289	1.1784	0.53525	0.13307
PPIF	0.718569	0.550808	0.467425	0.913383	0.750655	0.742274
ANXA11	0.746133	0.54308	0.248132	0.954751	0.649329	0.238003
FAM213A	0.795883	0.515421	0.158743	1.16073	0.641441	0.259572
TSPAN14	0.754827	0.372116	0.0738649	1.15023	0.579472	0.113776
GHITM	0.850792	0.619002	0.303124	1.00674	0.762068	0.446705
CCSER2	1.16107	0.871308	0.361136	1.0326	0.495725	0.186083
WAPAL	0.996258	0.711692	0.377068	1.09607	0.608902	0.511059
MINPP1	0.861346	0.416181	0.27499	0.952948	0.635807	0.444274
PAPSS2	0.741819	0.487051	0.148559	1.04484	0.625657	0.19143
ATAD1	0.859231	0.45895	0.105996	0.858389	0.515449	0.197178
RNLS	0.941299	0.555277	0.21359	0.857584	0.690387	0.317088
STAMBPL1	0.530557	0.715994	0.197023	0.723709	0.905829	0.207973
ACTA2	0.764769	0.533321	0.316308	0.994096	0.552045	0.232239
HECTD2	0.703719	0.50517	0.211094	1.02923	0.74291	0.346776
FAS	0.936311	0.541784	0.328619	0.91823	0.66524	0.330921
IFIT3	9.17747	32.3686	11.1613	9.81783	38.2176	13.9979
IFIT1	14.1605	57.3741	21.5178	17.8285	81.7691	31.0791
KIF20B	0.808622	0.490944	0.118591	1.09756	0.509066	0.109006
RPP30	0.829056	0.583472	0.228974	0.847144	0.590562	0.246084
ANKRD1	0.841264	0.950996	0.328409	1.12807	1.37552	0.585114
PCGF5	0.778634	0.786837	0.660145	1.0841	1.04205	0.615534
PPP1R3C	0.532248	0.0622212	0.0829536	0.723044	0.0903395	0.0882555
TNKS2	0.826867	0.475369	0.145832	0.937476	0.570851	0.202389
BTAF1	0.873147	0.510722	0.180568	0.850708	0.582151	0.224547
42068	0.741456	0.553523	0.19578	0.964607	0.695653	0.313593
IDE	1.00349	0.531639	0.180872	0.924107	0.536195	0.185688
KIF11	0.966466	0.53078	0.145621	0.962547	0.507868	0.185237
HHEX	0.515488	0.224993	0.320662	0.666762	0.308852	0.431548
EXOC6	0.841387	0.52204	0.136449	0.871922	0.542728	0.125763
MYOF	0.893376	0.570783	0.139128	1.01163	0.583529	0.14587
FRA10AC1	0.898117	0.522002	0.171998	1.01191	0.538167	0.290266
SLC35G1	0.895555	0.603655	0.276578	0.970402	0.517706	0.218523
PLCE1	1.00474	0.615794	0.172108	1.10099	0.370065	0.0790411
NOC3L	0.817986	0.446865	0.138725	0.896062	0.585648	0.164257
HELLS	0.925098	0.458071	0.0817509	1.04231	0.609411	0.130119
PDLIM1	0.833481	0.585503	0.410992	0.980104	0.748699	0.471946
ALDH18A1	0.896686	0.523977	0.227371	1.08073	0.657722	0.373495
TCTN3	0.797125	0.432344	0.222131	1.05134	0.582397	0.282976
ZNF518A	0.961678	0.665998	0.192693	0.952399	0.525539	0.13669
TM9SF3	0.907728	0.598612	0.277968	0.991274	0.643485	0.261285
C10orf12	0.887794	0.50606	0.149747	0.929938	0.415798	0.140825
RRP12	0.684046	0.502414	0.123909	0.964409	0.599043	0.229802
EXOSC1	0.806913	0.592095	0.345294	0.992378	0.718337	0.49465
ZDHHC16	0.875872	0.802843	0.409814	1.00385	0.610257	0.237539
MMS19	0.787961	0.390552	0.10664	0.961472	0.464374	0.121706
UBTD1	0.800826	0.549964	0.173312	0.861879	0.686097	0.233359
PI4K2A	0.664589	0.366811	0.126213	0.975421	0.443529	0.174766
AVPI1	0.714925	0.317462	0.103184	0.922279	0.491136	0.178842
MARVELD1	0.999944	0.57791	0.37317	1.12238	0.532215	0.323433
ZFYVE27	0.784403	0.582765	0.114128	0.976859	0.719204	0.181181
R3HCC1L	1.03121	0.571014	0.206219	0.905433	0.436962	0.129247
PYROXD2	0.774926	0.505797	0.188912	1.05237	0.614456	0.245387
CNNM1	0.731952	0.374958	0.0599258	0.992747	0.44598	0.0914929
GOT1	0.878036	0.577919	0.279582	1.02577	0.712291	0.361559
SLC25A28	0.899296	1.37348	0.591499	0.990382	1.43887	0.682699
ENTPD7	0.852187	0.731432	0.31713	0.89355	0.723735	0.323396
COX15	0.865006	0.445189	0.182244	1.19924	0.57168	0.214073
CUTC	0.872811	0.345054	0.110382	1.01778	0.45247	0.138354
ABCC2	0.920525	0.516684	0.140594	0.953135	0.580759	0.101656
DNMBP	0.854062	0.576288	0.234213	0.993819	0.580335	0.159412
ERLIN1	0.840667	0.374437	0.191024	1.00459	0.522185	0.341005
CHUK	0.809846	0.646109	0.243407	1.01316	0.661759	0.219723
CWF19L1	0.71958	0.489765	0.238821	0.987057	0.654272	0.411378
BLOC1S2	0.75468	0.659176	0.354206	0.938479	0.718536	0.446703
SCD	0.832529	0.401049	0.0531661	1.0385	0.380087	0.107058
NDUFB8	0.740057	0.556101	0.316861	0.98084	0.823102	0.599854
HIF1AN	0.805398	0.477794	0.144236	0.965351	0.584744	0.169608
FAM178A	0.941149	0.82943	0.627862	0.963566	0.657671	0.313761
SEMA4G	1.12124	0.677245	0.223013	1.06587	0.505295	0.275994
MRPL43	0.86192	0.528911	0.222353	1.02401	0.764922	0.42248
C10orf2	0.902924	0.47932	0.514023	1.02018	0.489422	0.554876
LZTS2	0.960415	0.475285	0.440823	1.05486	0.657544	0.527173
SFXN3	0.871764	0.601465	0.30001	1.18212	0.636665	0.279741
BTRC	0.872787	0.454815	0.0711995	0.972411	0.555518	0.102979
POLL	0.659432	0.290157	0.102444	0.938177	0.47429	0.118949
DPCD	1.10012	0.671949	0.607576	1.06743	0.950821	0.654044
NPM3	0.861484	0.539834	0.415064	1.06546	0.862725	0.612669
MGEA5	1.00535	0.584487	0.203185	0.978474	0.594622	0.253328
HPS6	0.703932	0.429795	0.269335	0.939338	0.548135	0.362884
PPRC1	0.841485	0.524549	0.2597	0.962658	0.489901	0.289634
NOLC1	0.781517	0.479656	0.247493	1.08065	0.624177	0.454805
GBF1	0.880437	0.491377	0.15275	0.977782	0.658918	0.25235
NFKB2	0.435758	0.662008	0.35137	0.611111	0.779269	0.237921
FBXL15	0.840505	0.42361	0.314115	0.96344	0.617	0.355928
CUEDC2	0.726392	0.538836	0.298295	0.980399	0.754454	0.442927
ACTR1A	0.78978	0.4321	0.142736	0.968602	0.579444	0.210933
TRIM8	0.869122	0.696853	0.326453	0.925936	0.630539	0.213517
ARL3	0.792851	0.517379	0.250975	0.933314	0.717605	0.456228
WBP1L	1.10912	0.575676	0.478921	0.935878	0.540497	0.345826
C10orf32	0.71136	0.590524	0.295582	0.905825	0.695368	0.456115
AS3MT	0.874708	0.381628	0.104571	1.04366	0.548379	0.246474
CNNM2	0.909911	0.396702	0.214854	1.06669	0.515863	0.176253
NT5C2	0.808598	0.619728	0.211868	0.947449	0.698774	0.248571
INA	0.690152	0.550673	0.336243	1.04728	0.834691	0.718387
USMG5	1.08218	0.592674	0.156651	0.84243	0.558397	0.498685
PDCD11	0.801479	0.578005	0.182043	0.965862	0.65768	0.221643
SH3PXD2A	1.10551	0.470846	0.116969	0.974508	0.353966	0.0655547
OBFC1	0.975597	0.562588	0.337777	0.952316	0.58352	0.231999
SLK	0.88022	0.493885	0.10349	0.938096	0.461458	0.122837
GSTO1	0.817496	0.582577	0.233539	0.901241	0.6971	0.448948
ITPRIP	0.792825	0.383623	0.146066	1.13414	0.617351	0.152669
XPNPEP1	0.80107	0.563378	0.191879	1.00491	0.626207	0.249618
ADD3	0.878869	0.456107	0.130071	1.04815	0.536302	0.212579
SMNDC1	0.886094	0.544402	0.121575	0.916749	0.538106	0.140003
DUSP5	1.11816	0.443418	0.284821	1.31176	0.479498	0.264176
SMC3	0.917535	0.489778	0.131376	0.993316	0.521281	0.210575
PDCD4	0.866808	0.471435	0.147344	0.927707	0.388537	0.153452
SHOC2	0.896601	0.565219	0.201316	0.874016	0.508839	0.209326
GPAM	0.70357	0.437221	0.155674	1.15957	0.748449	0.314677
ZDHHC6	1.32235	0.897481	0.483659	0.96905	0.602791	0.386484
TCF7L2	1.135	0.564406	0.122254	1.14946	0.642597	0.194261
NHLRC2	0.981117	0.514868	0.114341	0.960439	0.447367	0.0782669
C10orf118	0.843854	0.448426	0.303534	0.899072	0.448985	0.286857
AFAP1L2	0.928711	0.43016	0.11177	1.2779	0.603646	0.132128
FAM160B1	0.844539	0.491197	0.166261	0.939623	0.540967	0.169895
TRUB1	0.932699	0.563869	0.366346	0.952479	0.690233	0.490975
HSPA12A	0.857723	0.666979	0.202409	1.0484	0.551281	0.161504
PDZD8	1.02134	0.763025	0.267055	1.05491	0.467663	0.147577
RAB11FIP2	0.774017	0.972822	0.175428	0.80446	0.508683	0.153404
CACUL1	1.02168	0.632396	0.236296	1.04314	0.621045	0.183451
EIF3A	0.862604	0.570897	0.23901	1.02001	0.63888	0.382816
SFXN4	0.645378	0.436139	0.235105	0.923429	0.668563	0.28176
PRDX3	1.00004	0.515522	0.168375	0.959757	0.614817	0.418435
RGS10	0.988065	0.564107	0.214904	0.983085	0.653884	0.372064
TIAL1	0.829803	0.565331	0.230739	0.972269	0.72356	0.296966
BAG3	0.773367	0.54049	0.635667	1.05806	0.820975	1.3089
INPP5F	1.02264	0.304174	0.102666	1.15104	0.495061	0.139287
MCMBP	0.771332	0.46876	0.145399	0.944527	0.550347	0.205162
SEC23IP	0.877511	0.46633	0.181843	1.02061	0.524589	0.171112
ATE1	0.824626	0.550488	0.252688	1.14918	0.684023	0.249893
NSMCE4A	0.835409	0.560426	0.180992	0.965295	0.655757	0.201015
TACC2	0.785721	0.478459	0.0910467	0.881522	0.480565	0.0718328
PLEKHA1	1.03641	0.661699	0.271771	1.00704	0.696929	0.214418
HTRA1	0.727463	0.488783	0.226135	1.01572	0.62767	0.317044
C10orf88	0.701893	0.386777	0.277452	0.922369	0.752033	0.282369
PSTK	0.609952	0.524981	0.14443	0.86641	0.736833	0.203683
ACADSB	0.831805	0.487636	0.195976	0.938782	0.603302	0.246981
BUB3	0.923134	0.483372	0.138008	1.0198	0.568988	0.15446
CHST15	0.52955	0.49321	0.142023	0.863571	0.43361	0.0798611
OAT	0.879429	0.548861	0.198888	0.799613	0.565471	0.29425
LHPP	0.850897	0.606686	0.349059	0.932597	0.982118	0.587944
METTL10	1.07978	0.814119	0.317686	0.916323	0.697166	0.275329
FAM175B	0.9102	0.478573	0.452115	0.807436	0.5545	0.53265
ZRANB1	0.855118	0.537633	0.246782	0.952746	0.481892	0.115318
C10orf137	0.864233	0.594981	0.274772	1.00526	0.675695	0.266212
UROS	0.848942	0.741781	0.653335	1.05279	0.69026	0.415
BCCIP	0.755804	0.508769	0.373772	1.00388	0.750398	0.603284
DHX32	0.824145	0.419528	0.15394	0.970019	0.471821	0.148869
DOCK1	0.815894	0.541953	0.195577	1.0146	0.571554	0.129237
MKI67	0.947817	0.45473	0.147984	1.02665	0.423717	0.134188
MGMT	0.768825	0.587663	0.352135	0.976523	0.777268	0.678666
GLRX3	0.739832	0.49605	0.25958	0.968988	0.693231	0.269437
PPP2R2D	0.859856	0.907163	0.282017	0.960496	0.740936	0.196361
STK32C	0.782574	0.508143	0.133622	0.975183	0.553122	0.145066
PWWP2B	0.81274	0.47619	0.26046	1.15958	0.573919	0.274012
INPP5A	0.874647	0.953841	0.468355	1.03899	0.689526	0.211466
ZNF511	0.896423	0.626709	0.619824	0.899443	0.733386	0.56175
B4GALNT4	0.76894	0.921162	0.376979	0.944947	0.471169	0.165807
ECHS1	0.672045	0.453728	0.169234	0.958224	0.661525	0.254558
MTG1	0.748751	0.49888	0.255137	0.92042	0.749785	0.288417
BET1L	0.810241	0.396772	0.160523	0.969108	0.457276	0.172728
RIC8A	0.784467	0.676942	0.362896	0.975189	0.770979	0.379705
SIRT3	0.773517	0.464883	0.240692	1.06745	0.5926	0.221191
PSMD13	0.740716	0.525038	0.315373	0.955101	0.752852	0.538902
IFITM2	1.17349	0.988403	0.628281	1.07464	1.2344	1.16876
PKP3	0.817262	0.541017	0.170989	1.03148	0.586011	0.17721
SIGIRR	0.725931	0.51688	0.354899	0.99298	0.826607	0.692241
PTDSS2	0.811448	0.660779	0.371718	0.948281	0.701914	0.293693
RNH1	0.751756	0.50853	0.226283	1.01511	0.717232	0.33415
RASSF7	0.787826	0.368966	0.164411	0.978411	0.500584	0.182443
IRF7	0.808094	7.564	5.60926	1.36747	19.403	9.47473
DEAF1	1.20962	0.598583	0.200206	1.08724	0.639744	0.221319
EPS8L2	0.82314	0.508078	0.212229	1.02539	0.652183	0.234165
TALDO1	0.77263	0.567261	0.334347	1.03076	0.784986	0.509504
PDDC1	0.683568	0.294605	0.182944	0.884702	0.494628	0.230737
PIDD	0.799713	0.608786	0.253214	1.07851	0.517978	0.237056
MUC5B	0.995022	0.432685	0.0628744	1.24001	0.498033	0.114691
RPLP2	0.778008	0.774241	0.697129	1.25191	1.07561	1.53119
PNPLA2	0.743891	0.563449	0.269298	1.07632	0.720089	0.32172
CD151	0.807033	0.499969	0.246404	0.995229	0.696925	0.349867
POLR2L	0.735266	0.498412	0.299937	0.984418	0.778545	0.57738
TSPAN4	0.74131	0.484114	0.258653	1.04992	0.78364	0.373836
CHID1	0.749736	0.498448	0.294448	1.04603	0.744082	0.423884
AP2A2	0.703346	0.403284	0.113421	0.956834	0.491954	0.133037
TOLLIP	0.713518	0.517473	0.218664	0.993952	0.718646	0.341328
MOB2	1.9816	1.26426	0.450635	1.05863	0.723884	0.102675
CTSD	0.816202	0.491741	0.242435	1.05479	0.735836	0.401487
MRPL23	0.83975	0.589335	0.354848	1.09695	0.885101	0.613328
CD81	0.808688	0.546099	0.304568	1.0857	0.75219	0.47191
TSSC4	0.800482	0.581984	0.367596	0.974871	0.796181	0.451337
SLC22A18	0.80627	0.565052	0.358737	0.88248	0.611574	0.342796
PHLDA2	0.656222	0.634808	0.556766	0.970148	1.00056	0.911168
NAP1L4	1.01306	0.550657	0.122005	1.0801	0.619946	0.163478
CARS	0.750279	0.734033	0.32672	0.928075	1.02517	0.470086
ZNF195	0.944871	0.506925	0.0919102	0.919073	0.486275	0.0715082
NUP98	0.843736	0.519941	0.134208	1.00622	0.578711	0.133939
RHOG	0.817936	0.609692	0.277119	0.91706	0.658514	0.272746
RRM1	0.940576	0.533038	0.164557	1.00504	0.548204	0.18867
TRIM21	0.9168	3.04152	2.68524	1.30249	4.67374	5.02009
TRIM68	0.783269	0.489436	0.168695	1.07889	0.601516	0.151906
TRIM6-TRIM34	0.974796	0.563044	0.28154	1.15663	0.659032	0.385377
DNHD1	0.62994	0.487726	0.261065	0.877945	0.456311	0.127977
TRIM5	0.950813	0.729762	0.348017	0.963578	1.0468	0.50208
TRIM22	0.984342	0.885839	0.869179	1.08022	1.33292	1.46813
FAM160A2	0.886062	0.571323	0.138864	1.12373	0.606418	0.173479
PRKCDBP	0.635111	0.488883	0.453979	1.0603	0.909339	0.648888
SMPD1	0.645738	0.49926	0.12181	1.21692	0.744976	0.185209
APBB1	0.916225	0.59377	0.210059	1.07206	0.660602	0.243294
TIMM10B	0.78061	0.502146	0.187355	0.958793	0.686687	0.197353
RRP8	0.632964	0.406183	0.101068	1.04417	0.610925	0.166433
ILK	0.803117	0.538282	0.281002	0.969215	0.74261	0.373728
TAF10	0.717634	0.540962	0.460016	1.04615	0.730263	0.50485
TPP1	0.813165	0.452578	0.181647	0.962862	0.717969	0.315438
MRPL17	0.812708	0.493845	0.28456	0.963241	0.750853	0.371238
PPFIBP2	0.830801	0.303539	0.0683312	1.00124	0.337653	0.0903294
TUB	0.760905	0.671266	0.28111	0.938833	0.408973	0.143329
AKIP1	0.842086	0.508175	0.319187	1.01632	0.718584	0.485045
TMEM9B	0.811487	0.515134	0.384602	0.975631	0.698059	0.677603
DENND5A	0.762351	0.979164	0.587529	1.10165	0.805017	0.312924
TMEM41B	0.885441	0.524656	0.162041	0.861016	0.550593	0.25389
IPO7	0.9203	0.58717	0.111608	0.870604	0.47987	0.137795
ZNF143	0.804699	0.455351	0.132821	0.81314	0.548709	0.193706
WEE1	1.04205	0.379127	0.498251	1.30847	0.475406	0.777665
SWAP70	0.669671	0.444091	0.156757	0.881502	0.564613	0.186249
SBF2	0.807869	0.487265	0.23765	1.07411	0.470004	0.0986891
ADM	0.534405	0.474138	0.40107	0.784403	0.935326	0.656919
AMPD3	0.567292	0.301891	0.0920123	0.92391	0.45636	0.114373
RNF141	1.13272	0.729717	0.389491	1.05282	0.611321	0.276091
CTR9	0.898372	0.578838	0.254196	1.09936	0.711312	0.440234
EIF4G2	0.841807	0.62153	0.435417	0.986869	0.624311	0.379785
GALNT18	0.804774	0.568216	0.24295	1.0483	0.71243	0.187789
CSNK2A3	0.714855	0.329793	0.12875	0.830005	0.384966	0.115938
USP47	0.97402	0.634527	0.204194	0.933176	0.577022	0.162508
DKK3	0.744139	0.537963	0.331478	1.04465	0.785477	0.398337
MICAL2	0.727048	0.563652	0.121412	0.942668	0.55532	0.108612
PARVA	0.696101	0.564898	0.212012	0.950825	0.642992	0.267689
ARNTL	0.631756	0.407429	0.153521	1.05564	0.47194	0.104176
BTBD10	0.61434	0.403919	0.196509	0.777893	0.552102	0.10978
FAR1	0.838502	0.475392	0.0983121	0.903626	0.535509	0.143381
COPB1	0.873375	0.49014	0.138691	0.942047	0.603357	0.16319
PSMA1	0.805274	0.619004	0.19791	0.897687	0.683378	0.323198
CYP2R1	1.0602	0.331979	0.131352	0.876375	0.402417	0.122863
C11orf58	0.819389	0.478212	0.176071	0.975155	0.623501	0.299578
PLEKHA7	0.832106	0.50293	0.0763303	0.996472	0.634033	0.0753078
PIK3C2A	0.968725	0.6248	0.171291	0.977299	0.476794	0.130127
NUCB2	0.861968	0.447552	0.24146	0.93088	0.642358	0.430406
SERGEF	0.627742	0.582062	0.235065	0.986881	0.623516	0.305912
SAAL1	0.844919	0.519631	0.17257	1.0004	0.635288	0.261454
HPS5	0.935319	0.482405	0.238319	1.01188	0.579188	0.202107
GTF2H1	1.24974	0.879358	0.605746	0.868158	0.546185	0.394031
TSG101	0.759495	0.515111	0.210932	0.91686	0.625672	0.304732
UEVLD	0.872719	0.554272	0.265616	0.984709	0.711771	0.370154
SPTY2D1	0.851075	0.524471	0.522079	0.949756	0.626709	0.830424
ZDHHC13	0.868348	0.496802	0.160244	1.01667	0.626373	0.247354
HTATIP2	0.822999	0.590026	0.390622	0.96393	0.824705	0.622465
PRMT3	0.854803	0.490592	0.197249	0.997533	0.582287	0.267179
ANO5	0.915406	0.567219	0.235176	0.966253	0.575632	0.270535
FANCF	0.958825	0.647367	0.828703	0.960245	0.87809	0.826686
CCDC34	0.866361	0.469033	0.28068	1.06299	0.663739	0.316696
LGR4	0.878198	0.569173	0.223288	0.95931	0.430781	0.157929
LIN7C	0.88273	0.511694	0.21435	1.09484	0.684372	0.357726
ELP4	0.907444	0.442943	0.14615	0.923293	0.446451	0.135255
EIF3M	0.809256	0.578762	0.204362	0.948771	0.684464	0.246902
QSER1	1.23457	1.04183	0.643497	0.972983	0.538455	0.26767
CSTF3	1.00667	0.665367	0.328624	1.07452	0.734896	0.556252
CD59	0.760952	0.535483	0.202959	0.935414	0.698767	0.379001
FBXO3	0.90375	0.572805	0.264719	0.958815	0.585688	0.338093
CAPRIN1	0.925252	0.454583	0.153788	0.971983	0.472396	0.183731
NAT10	0.863109	0.470285	0.134604	1.0477	0.56302	0.161077
ABTB2	0.668708	0.512772	0.051254	1.03637	0.662226	0.084267
CAT	0.832698	0.502298	0.209847	0.935393	0.62255	0.364975
PDHX	0.856662	0.521002	0.225576	1.00361	0.581163	0.195921
CD44	0.77426	0.47517	0.119792	0.984853	0.620201	0.224189
FJX1	0.760615	0.880139	1.65595	1.00502	0.775566	1.22358
TRIM44	0.841297	0.558991	0.239191	1.14614	0.701695	0.213512
COMMD9	0.783335	0.442745	0.23573	0.975527	0.596979	0.259785
TTC17	0.872235	0.457049	0.144006	0.967681	0.57102	0.18491
HSD17B12	0.928318	0.480407	0.146434	0.972813	0.607024	0.374533
ALKBH3	0.820321	0.543525	0.328418	1.01985	0.818887	0.326853
EXT2	0.844703	0.458137	0.116231	1.04962	0.5563	0.178666
TP53I11	0.790758	0.478442	0.209839	1.10609	0.724911	0.30098
SYT13	0.818959	0.699171	0.339486	1.08344	0.781909	0.482139
PEX16	0.776184	0.508215	0.136442	0.818107	0.589095	0.261516
AMBRA1	1.01175	0.471974	0.237779	1.05306	0.562392	0.282063
ATG13	0.849769	0.617296	0.209024	0.948058	0.489515	0.1522
ARHGAP1	0.792124	0.372262	0.104534	1.02038	0.566067	0.209838
CKAP5	0.940273	0.503457	0.192528	1.00226	0.557913	0.202131
LRP4	0.825097	0.485298	0.178377	1.0015	0.474904	0.140449
C11orf49	0.888905	0.479216	0.267822	1.06724	0.539406	0.304747
ARFGAP2	0.76403	0.400501	0.101362	1.02364	0.468127	0.134803
PACSIN3	0.8072	0.501758	0.0611293	1.20212	0.519125	0.0916074
DDB2	0.763955	0.461658	0.206924	1.00822	0.607539	0.206735
ACP2	0.734331	0.433007	0.208396	1.06369	0.787581	0.283272
MADD	0.952518	0.330078	0.145091	0.977469	0.428477	0.173229
PSMC3	0.896097	0.613777	0.290994	1.13515	0.860509	0.576703
CELF1	0.755385	0.447887	0.0952901	1.02038	0.623946	0.163118
PTPMT1	0.732199	0.537931	0.346037	0.943556	0.696051	0.44062
KBTBD4	0.861831	0.405072	0.265609	1.09443	0.561981	0.471806
NDUFS3	0.814965	0.582854	0.336283	1.05473	0.767075	0.486848
NUP160	0.860811	0.508578	0.161605	1.02086	0.60369	0.235776
PTPRJ	0.895221	0.466559	0.12159	1.08157	0.465283	0.152763
TNKS1BP1	0.800108	0.552854	0.26964	0.961387	0.685379	0.331125
SSRP1	0.867092	0.521283	0.27173	1.04418	0.648928	0.319754
TIMM10	0.793795	0.573719	0.275715	1.10582	0.980582	0.695734
UBE2L6	0.764079	0.815342	0.678245	1.00327	1.24665	1.11744
CLP1	0.810379	0.497192	0.550054	0.992407	0.590589	0.811832
ZDHHC5	0.716677	0.618109	0.239994	1.02245	0.536135	0.229195
MED19	0.7166	0.405223	0.11565	0.946074	0.527305	0.189183
TMX2	0.915336	0.53219	0.241369	1.03926	0.706651	0.355292
CTNND1	0.890699	0.458966	0.0971971	1.07375	0.539672	0.119491
ZFP91	0.798357	0.611289	0.41382	1.00951	0.594946	0.253961
FAM111B	1.06305	0.593069	0.177158	1.03949	0.654485	0.235441
FAM111A	0.829884	0.748537	0.491349	0.947487	0.71987	0.683028
OSBP	0.748616	0.419354	0.220302	1.05634	0.576246	0.365443
PATL1	0.888612	0.795809	0.464664	0.990336	0.680997	0.410251
STX3	0.913702	0.46672	0.10687	0.914047	0.497982	0.114964
MRPL16	0.866995	0.606967	0.315326	0.943389	0.620109	0.412768
CCDC86	0.652101	0.446402	0.19968	0.991113	0.686004	0.365131
PRPF19	0.78946	0.50414	0.174872	0.99055	0.641677	0.237628
TMEM109	0.804238	0.573825	0.409352	1.09322	0.810488	0.717421
TMEM132A	0.846476	0.686981	0.324863	0.915918	0.782124	0.311323
VPS37C	0.70142	0.511029	0.264989	0.921354	0.622361	0.145527
DDB1	0.830482	0.512395	0.159937	1.05856	0.612077	0.230199
DAK	0.618655	0.526368	0.205269	1.04447	0.700757	0.320003
CYB561A3	0.775099	0.594088	0.178519	0.92994	0.617356	0.214825
TMEM138	0.965471	0.466109	0.121783	0.887374	0.466941	0.0910788
CPSF7	0.832243	0.456869	0.263321	0.927424	0.510671	0.294366
SDHAF2	0.82222	0.491249	0.162251	0.983917	0.6797	0.222883
MYRF	0.895101	0.470689	0.108983	1.07646	0.42403	0.0855187
TMEM258	0.82625	0.429728	0.201305	0.822694	0.592086	0.350593
FEN1	0.713393	0.420338	0.102251	1.05092	0.568089	0.215884
FADS2	0.87499	0.44713	0.139965	1.02339	0.513232	0.197582
FADS3	0.74897	0.646024	0.338382	1.00398	0.839107	0.380052
INCENP	0.879518	0.442666	0.179104	1.14336	0.521144	0.291277
AHNAK	0.962101	0.632783	0.354099	0.94899	0.613846	0.185569
TUT1	1.08252	0.378441	0.162963	1.15323	0.419024	0.348133
MTA2	0.783729	0.43064	0.303258	1.01471	0.605121	0.587937
EML3	0.759049	0.453587	0.20364	1.03685	0.583257	0.390567
GANAB	0.856115	0.436886	0.103132	1.1028	0.588839	0.167442
INTS5	0.849141	0.527639	0.3026	1.04838	0.776199	0.416005
C11orf48	0.602115	0.428768	0.360228	0.992963	0.765069	0.684556
C11orf83	0.726094	0.532282	0.429868	1.20012	1.00636	0.853858
UBXN1	0.793006	0.566149	0.326089	1.02651	0.816042	0.442678
BSCL2	1.00063	0.65038	0.479932	0.987941	0.709923	0.553814
HNRNPUL2	0.847709	0.47948	0.159537	1.12262	0.58323	0.222467
TTC9C	0.874978	0.56802	0.28884	1.06771	0.617865	0.529649
POLR2G	0.741583	0.549956	0.335658	1.04554	0.828163	0.649529
TAF6L	0.776374	0.524359	0.151967	0.898393	0.543951	0.16117
TMEM179B	0.739644	0.540371	0.349765	0.9465	0.676529	0.470679
TMEM223	0.770919	0.407521	0.117347	0.958442	0.611671	0.155067
NXF1	0.932378	0.693501	0.688007	1.168	0.906241	1.20907
STX5	0.632492	0.442407	0.079746	0.850487	0.488481	0.204438
WDR74	0.641491	0.57964	0.383501	1.00004	0.720149	0.64251
SLC3A2	0.726508	0.603518	0.356805	1.0791	0.98642	0.559919
ATL3	0.900609	0.575687	0.210842	0.984366	0.738116	0.382675
C11orf84	0.908676	0.789439	0.84053	1.00737	0.954747	0.694844
MARK2	0.667332	0.448953	0.168713	1.07715	0.623875	0.201085
COX8A	0.783668	0.616756	0.460785	1.07623	0.882292	0.897339
OTUB1	0.738256	0.508877	0.254148	0.960654	0.692734	0.323131
STIP1	0.964107	0.443418	0.0845729	1.0246	0.534688	0.153072
DNAJC4	0.784427	0.439058	0.432481	0.905339	0.504054	0.246132
VEGFB	0.866582	0.544639	0.447762	1.08287	0.668301	0.313123
FKBP2	0.70491	0.506065	0.400128	1.0403	0.84145	0.681435
BAD	0.846652	0.569674	0.458122	0.977355	0.826018	0.642486
TRMT112	0.701155	0.483412	0.206617	1.02053	0.776959	0.683299
PRDX5	0.755584	0.637063	0.406886	1.1297	0.981547	0.798014
RPS6KA4	0.852246	0.696859	0.450168	1.05192	0.732531	0.475367
PYGM	0.500865	461.331	8813.37	0.822837	4.61799	30.3511
SF1	0.790648	0.517444	0.197609	0.983023	0.633022	0.269671
MAP4K2	0.947372	0.712865	0.180901	0.965407	0.532342	0.231471
MEN1	0.787228	0.360507	0.257177	1.08293	0.689191	0.402246
EHD1	0.669213	0.427055	0.323963	0.978044	0.656176	0.559149
ATG2A	0.776868	0.346634	0.0880126	0.971658	0.411943	0.155747
BATF2	1.11277	34.7009	48.4141	0.971779	26.1451	28.1901
ARL2	0.778121	0.498281	0.360744	0.974146	0.7557	0.65627
ARL2-SNX15	0.640006	0.615344	0.341293	0.96951	0.677902	0.53943
SAC3D1	0.749155	0.540036	0.387988	1.03841	0.65622	0.540649
CDCA5	0.927404	0.578921	0.406115	1.07357	0.648577	0.394251
ZFPL1	0.875078	0.600977	0.199221	1.00296	0.609075	0.269021
VPS51	0.716307	0.496557	0.135369	0.903971	0.586876	0.149988
TM7SF2	0.780226	0.616524	0.381476	0.913815	0.627187	0.264036
ZNHIT2	0.591365	0.358523	0.101746	1.03415	0.515133	0.336983
FAU	0.881696	0.688314	0.425446	1.28735	1.04937	0.808892
MRPL49	0.751089	0.476608	0.0930347	0.93064	0.664197	0.174945
SYVN1	0.75855	0.45059	0.306468	1.00633	0.612298	0.483738
POLA2	0.792033	0.402195	0.06673	1.03239	0.517603	0.102765
DPF2	0.685215	0.449156	0.361523	0.870183	0.779563	0.700889
SCYL1	0.815137	0.626019	0.273884	0.97789	0.655473	0.243411
LTBP3	0.847507	0.648781	0.206769	1.02315	0.547528	0.143671
SSSCA1	0.717155	0.562484	0.258994	0.961498	0.781684	0.409687
FAM89B	0.808545	0.89802	0.502742	1.08351	0.855631	0.409929
EHBP1L1	0.942986	0.626599	0.192925	1.09271	0.644879	0.199582
MAP3K11	0.976813	1.02362	0.344412	0.935534	0.624169	0.178282
PCNXL3	1.03253	0.678501	0.158157	0.96154	0.567191	0.138999
SIPA1	0.759008	0.441578	0.0726461	1.13262	0.558352	0.192033
RELA	0.917017	0.754634	0.306234	0.996751	0.882807	0.334207
KAT5	0.693815	0.36732	0.128215	0.913192	0.5501	0.206826
RNASEH2C	0.793755	0.55781	0.49835	1.04334	0.892502	0.749036
CFL1	0.811042	0.555973	0.178959	1.00314	0.693374	0.419572
MUS81	0.797532	0.612849	0.148257	0.881617	0.596336	0.133428
FIBP	0.763373	0.572923	0.483745	1.02717	0.764482	0.521865
CCDC85B	0.794386	0.625754	0.316004	1.10171	0.760758	0.280369
FOSL1	0.715961	0.404564	0.218603	0.822504	0.399474	0.234176
C11orf68	0.771643	0.390033	0.419889	0.96144	0.557246	0.524802
DRAP1	0.721712	0.536736	0.440512	1.02138	0.791272	0.580026
SART1	0.80953	0.488438	0.210107	1.05464	0.652736	0.36373
SF3B2	0.748767	0.463753	0.185637	1.02838	0.641483	0.247386
PACS1	0.897099	0.533126	0.215887	1.00479	0.701959	0.191563
KLC2	0.733412	0.588382	0.328276	1.01186	0.751027	0.371659
YIF1A	0.768376	0.547411	0.215093	1.07267	0.76739	0.336699
RIN1	0.812409	0.557152	0.194381	0.932694	0.500254	0.412674
BRMS1	0.858822	0.6848	0.47141	0.978246	0.805571	0.389013
B3GNT1	0.860545	0.395393	0.195978	1.22358	0.569305	0.378288
MRPL11	0.780221	0.596384	0.407237	0.951752	0.860224	0.739398
DPP3	0.855593	0.563709	0.181568	1.00555	0.597966	0.215966
BBS1	0.90552	0.393873	0.224315	0.969331	0.45229	0.281884
ZDHHC24	0.670531	0.534922	0.24586	1.16336	0.768306	0.437979
CTSF	0.848734	0.500985	0.347797	1.03161	0.704432	0.41996
CCS	0.740739	0.497476	0.312427	1.21554	0.852016	0.48073
RBM14	0.775213	0.386889	0.0790519	1.04056	0.426156	0.0902903
RCE1	0.730949	0.568629	0.246355	0.958331	0.734605	0.403743
PC	0.796551	0.383155	0.0462076	1.03416	0.416779	0.0793376
LRFN4	0.981961	0.806249	0.539818	1.02226	0.508507	0.26696
RHOD	0.808795	0.690015	0.342933	1.09896	0.650375	0.349659
KDM2A	0.778338	0.629078	0.543629	1.00583	0.641121	0.622519
ANKRD13D	1.09466	0.60305	0.329958	0.926304	0.643508	0.233865
SSH3	0.947717	0.574719	0.358744	1.03158	0.540835	0.379427
POLD4	0.784483	0.549151	0.332788	1.0453	0.805077	0.505697
PPP1CA	0.724119	0.532555	0.31292	0.952541	0.731056	0.486668
RPS6KB2	1.27719	1.1229	0.44368	1.08344	0.645853	0.219341
CORO1B	0.756757	0.543127	0.257016	1.05033	0.678153	0.316762
TMEM134	0.896399	0.677999	0.83434	1.03465	0.837498	0.567957
AIP	0.735521	0.442451	0.217245	1.11038	0.772736	0.332817
PITPNM1	0.779459	0.78639	0.288944	0.961883	0.617814	0.393517
CDK2AP2	0.525511	0.546888	0.387709	0.924228	0.492919	0.707617
GSTP1	0.798829	0.56304	0.399097	0.9927	0.818293	0.749176
NDUFV1	0.809388	0.584652	0.350816	1.0509	0.794498	0.483951
NUDT8	0.719673	0.449059	0.345031	0.782872	0.670741	0.327327
UNC93B1	0.862363	0.524879	0.212351	1.15113	0.638384	0.231383
ALDH3B1	0.715352	0.48334	0.173031	1.02854	0.552659	0.17642
NDUFS8	0.717509	0.521856	0.373706	1.02806	0.772386	0.554236
TCIRG1	0.754583	0.486686	0.156792	0.96752	0.582885	0.164555
CHKA	0.69304	0.54317	0.137984	1.00385	0.652345	0.25504
SUV420H1	0.803037	0.577684	0.23316	0.943403	0.571943	0.216938
C11orf24	0.976022	0.579936	0.245725	1.03789	0.477621	0.156372
LRP5	0.962361	0.573834	0.185595	1.08258	0.535229	0.196665
PPP6R3	0.956007	0.510486	0.116501	0.976069	0.519017	0.106692
CPT1A	0.833305	0.472627	0.119431	1.17815	0.66423	0.204857
MRPL21	0.692535	0.567193	0.374714	0.984037	0.871643	0.600484
IGHMBP2	0.788483	0.551188	0.194357	0.963909	0.530414	0.148645
MYEOV	0.775108	0.541619	0.210864	1.00188	0.51058	0.156011
CCND1	0.721427	0.535298	0.289379	1.05018	0.802442	0.410203
FADD	0.725545	0.435597	0.158578	0.884952	0.617662	0.237116
PPFIA1	0.804001	0.588225	0.151849	1.0858	0.685598	0.180221
CTTN	0.881808	0.598864	0.244959	1.07391	0.803914	0.344748
SHANK2	0.888057	0.484643	0.0713865	1.03504	0.519917	0.0727513
DHCR7	0.861294	0.459825	0.244475	1.09844	0.566701	0.383789
NADSYN1	0.827232	0.551166	0.270788	0.905171	0.651468	0.321238
RNF121	0.856575	0.481891	0.161084	1.00293	0.671138	0.213469
NUMA1	0.870047	0.410274	0.0972619	1.06836	0.453343	0.183541
ARHGEF17	0.947821	0.593353	0.112212	0.955231	0.602704	0.0995921
LAMTOR1	0.852226	0.600749	0.355483	1.05742	0.683094	0.327613
ANAPC15	1.45465	0.945035	0.680193	1.13038	0.862613	0.641889
INPPL1	0.853928	0.676063	0.21996	0.983981	0.608423	0.179794
ARAP1	0.872393	0.453191	0.114809	1.08661	0.497391	0.137913
STARD10	0.798082	0.756432	0.911571	0.900654	0.755382	0.428732
P2RY6	0.786058	0.45929	0.0936913	0.848258	0.571657	0.12473
COA4	0.781656	0.569661	0.35328	1.17048	0.778078	0.449852
PAAF1	0.775276	0.483978	0.111432	1.17031	0.564775	0.213507
UCP2	1.3359	1.36308	0.85348	1.13829	0.597196	0.322879
C2CD3	0.723867	0.470034	0.201946	1.04645	0.531817	0.127213
P4HA3	0.789656	0.388549	0.190806	0.919396	0.598775	0.340355
PGM2L1	0.931891	0.729123	0.253294	0.860284	0.649873	0.353136
POLD3	0.865817	0.378269	0.106905	0.975315	0.440759	0.134506
RNF169	0.592391	0.305147	0.0595491	0.925459	0.382499	0.215166
ARRB1	0.793691	0.479943	0.0368328	1.24231	0.509235	0.0994735
SERPINH1	0.702107	0.330176	0.140522	1.22062	0.59097	0.52375
UVRAG	1.23821	0.594875	0.255302	1.19837	0.564008	0.182218
C11orf30	0.825743	0.474703	0.205051	0.984575	0.490515	0.115238
CAPN5	0.799873	0.513243	0.207724	0.963929	0.573491	0.130681
PAK1	0.761941	0.45428	0.183822	0.967718	0.571152	0.282163
CLNS1A	0.742194	0.468035	0.190608	0.987335	0.559504	0.220778
RSF1	0.924813	0.380901	0.27562	1.02057	0.542499	0.382098
INTS4	1.03219	0.35958	0.10128	0.971329	0.5288	0.128842
ALG8	0.817566	0.534894	0.241714	0.986864	0.689834	0.38873
NARS2	0.865391	0.485419	0.199739	0.928285	0.54038	0.186923
PRCP	0.781073	0.501857	0.200908	0.982904	0.622964	0.356724
C11orf82	0.975936	0.562596	0.438012	0.992837	0.514838	0.201719
PCF11	0.844024	1.0153	1.27525	1.02679	1.01517	1.62471
CCDC90B	0.74097	0.472716	0.236557	0.915764	0.567511	0.284589
TMEM126B	0.911751	0.622271	0.462414	0.939366	0.652358	0.366506
TMEM126A	0.826574	0.542579	0.243353	0.848763	0.616972	0.296204
CREBZF	0.96025	0.698102	0.597895	0.899473	0.583585	0.292153
SYTL2	1.19784	0.922956	0.670125	0.917609	0.89364	0.459878
FAT3	0.978669	0.826814	0.47972	0.95576	0.463245	0.0911161
PICALM	0.93709	0.576623	0.217805	0.86568	0.552068	0.193773
EED	0.870765	0.44855	0.0823703	1.09687	0.659222	0.136957
ME3	1.05649	0.522423	0.30705	1.01348	0.736369	0.332701
PRSS23	0.813499	0.610035	0.350776	1.01737	0.749132	0.423546
TMEM135	0.913023	0.470183	0.144026	1.04005	0.457137	0.182984
CTSC	0.778746	0.496552	0.247986	1.00464	0.695278	0.371067
SLC36A4	0.751792	0.563512	0.458364	0.919137	0.569725	0.268294
TAF1D	0.87744	0.524973	0.510771	1.04191	0.48975	0.400002
C11orf54	0.929126	0.457874	0.170544	0.934715	0.60268	0.238698
MED17	0.792789	0.563637	0.366241	0.876812	0.599775	0.423582
PANX1	0.812294	0.742913	0.209309	1.09792	0.745579	0.244185
MRE11A	1.16598	0.379697	0.149141	1.0194	0.494555	0.135946
AMOTL1	0.751359	0.473115	0.0725994	1.01484	0.405636	0.0936437
CWC15	0.829307	0.62247	0.324412	0.982052	0.800833	0.604306
SRSF8	0.697853	0.574488	0.311723	1.16592	0.691299	0.633682
ENDOD1	0.891006	0.585329	0.214041	1.16106	0.794637	0.263928
FAM76B	0.629113	0.672986	0.760683	1.04714	0.686821	0.627877
CEP57	0.940008	0.44609	0.113003	1.01887	0.472995	0.184217
MTMR2	0.781195	0.493797	0.232491	0.994195	0.562197	0.206645
DYNC2H1	1.01224	0.592906	0.292437	0.886712	0.411882	0.0890301
CCDC82	1.04508	0.761119	0.378384	0.940325	0.829861	0.379049
YAP1	0.845345	0.538286	0.223167	1.01739	0.659739	0.253358
BIRC3	0.788937	1.57383	0.507166	0.785411	0.87183	0.162875
TMEM123	0.819365	0.527778	0.289917	0.913353	0.555446	0.301064
MMP7	0.809815	0.580629	0.302585	0.950811	0.751853	0.590202
DCUN1D5	0.765112	0.547046	0.226154	0.89407	0.721747	0.39462
PDGFD	0.909657	0.468962	0.181285	0.984383	0.542043	0.219807
CASP4	0.67208	0.655611	0.333169	0.844197	0.762407	0.350558
ATM	1.06434	0.702331	0.276182	0.960684	0.502908	0.17704
MSANTD4	0.726187	0.467532	0.325388	1.00458	0.662015	0.436243
AASDHPPT	0.819704	0.435573	0.291612	0.965628	0.599219	0.57102
SLC35F2	0.650273	0.505858	0.307349	0.960711	0.563271	0.451769
CUL5	0.849315	0.562289	0.185759	0.945383	0.483172	0.105919
ACAT1	0.903743	0.575828	0.24805	0.969914	0.686912	0.367935
NPAT	0.957691	0.391967	0.0891544	0.950714	0.310246	0.0638039
KDELC2	0.857092	0.606699	0.318376	1.0266	0.641524	0.43175
SIK2	0.709014	0.457109	0.143125	0.85757	0.42806	0.181245
PPP2R1B	0.876297	0.483133	0.108403	1.09418	0.483086	0.202768
C11orf1	0.811341	0.580653	0.277935	1.00458	0.669529	0.472156
DLAT	0.850464	0.623636	0.25789	0.94267	0.603304	0.315839
C11orf57	0.750407	0.541744	0.474794	0.899344	0.553949	0.431755
IL18	0.801666	0.571092	0.159936	0.868767	0.650904	0.266988
PTS	0.863829	0.611228	0.399773	0.939632	0.873295	0.545743
TTC12	0.826937	0.415249	0.128742	0.886836	0.581558	0.215432
ZW10	0.859098	0.509815	0.120346	0.942655	0.557221	0.204129
USP28	0.924027	0.388047	0.162752	1.06244	0.549515	0.204122
NNMT	0.718932	0.673532	0.261217	0.978159	1.02231	0.388547
REXO2	0.773216	0.574712	0.293521	0.985573	0.719708	0.423757
CADM1	0.915682	0.521547	0.226155	0.932924	0.643102	0.324785
BUD13	0.785401	0.35352	0.132095	1.18116	0.398801	0.15103
KMT2A	1.04729	0.631122	0.275566	1.02655	0.608681	0.199528
ZNF259	0.466673	0.530711	0.367296	0.956872	0.74494	0.475235
SIK3	0.837092	0.5373	0.133189	1.00962	0.640738	0.159988
PAFAH1B2	0.764186	0.326559	0.108025	0.947112	0.469429	0.13798
RNF214	0.813097	0.368171	0.138645	1.01776	0.437025	0.147262
CEP164	1.23406	0.556346	0.210118	1.11605	0.719146	0.125115
UBE4A	0.814861	0.483223	0.149774	1.02334	0.600401	0.171758
IFT46	1.16078	0.545057	0.238873	1.03556	0.620645	0.181542
ARCN1	0.837479	0.504017	0.214548	0.921752	0.673427	0.361428
DDX6	0.995503	0.598053	0.26503	1.15557	0.614832	0.411199
BCL9L	0.879578	0.553981	0.236895	1.00154	0.469333	0.176841
RPS25	0.654724	0.584233	0.262339	1.23968	0.947054	0.75616
HYOU1	0.810769	0.427879	0.223803	1.00797	0.593818	0.55131
HMBS	0.758274	0.522864	0.210738	0.9971	0.736577	0.278345
H2AFX	0.683009	0.559695	0.448128	1.17421	0.883716	0.657512
DPAGT1	0.887156	0.468041	0.182059	1.0378	0.615253	0.327687
NLRX1	0.921668	0.506809	0.214346	1.29385	0.525741	0.195958
CBL	0.748609	0.507992	0.181077	0.957737	0.658273	0.195278
MCAM	0.794315	0.578932	0.190051	0.987931	0.70437	0.328932
RNF26	0.803479	0.622724	0.494391	1.09634	0.654824	0.36346
TMEM136	0.596017	0.514944	0.47825	1.0195	0.590033	0.490495
ARHGEF12	0.819401	0.660745	0.211997	1.02003	0.533333	0.121444
SC5D	0.942004	0.543504	0.225377	1.06468	0.637011	0.398017
SORL1	0.992805	0.42732	0.0626865	1.07589	0.485808	0.0939278
UBASH3B	0.90289	0.507618	0.110301	0.940835	0.573344	0.0964015
HSPA8	0.79877	0.495259	0.129436	1.22349	0.72749	0.601304
GRAMD1B	0.718375	0.440652	0.131048	0.89572	0.424208	0.118807
TBRG1	0.837451	0.702105	0.463203	0.961464	0.704486	0.274978
SIAE	0.879069	0.474878	0.198506	0.968765	0.686707	0.354597
STT3A	0.893596	0.459635	0.157032	1.02751	0.570143	0.277587
CHEK1	0.777471	0.50733	0.150641	0.984739	0.453369	0.131653
PUS3	0.915076	0.799119	0.793505	1.33973	1.00965	1.56476
RPUSD4	0.716217	0.373159	0.124043	0.957758	0.516978	0.163506
FAM118B	0.724328	0.297375	0.0917179	0.842849	0.436997	0.112357
PRDM10	0.662884	0.382678	0.0401797	0.76602	0.54766	0.150173
SRPR	0.823143	0.633391	0.227413	1.03163	0.619286	0.23455
FOXRED1	0.724898	0.521907	0.265123	1.04461	0.704377	0.344915
DCPS	0.81552	0.460243	0.301299	1.02966	0.603877	0.356857
ST3GAL4	0.680571	0.539447	0.276664	0.986078	0.748263	0.210485
ETS1	0.680748	0.501399	0.295104	0.883754	0.629211	0.314276
NFRKB	0.788994	0.407172	0.100887	0.926265	0.48107	0.211701
ZBTB44	0.815808	0.608387	0.342868	0.963428	0.46462	0.163221
SNX19	1.05859	0.50781	0.160197	1.15017	0.490722	0.134691
NCAPD3	0.945146	0.495034	0.100102	1.12445	0.495848	0.0965872
VPS26B	1.01315	0.495306	0.22873	1.15206	0.656528	0.247838
THYN1	0.824065	0.432772	0.157154	0.88156	0.557215	0.266403
ACAD8	0.798443	0.545946	0.286579	1.0017	0.823798	0.523752
KDM5A	0.819253	0.380945	0.0543541	0.955995	0.442005	0.0924642
CCDC77	0.826876	0.377038	0.331854	1.13687	0.555624	0.367209
ERC1	0.797993	0.408807	0.0891413	1.15559	0.515531	0.119569
FBXL14	1.18342	0.71352	0.749198	0.981062	0.56192	0.339538
ADIPOR2	0.855891	0.448694	0.229905	1.01704	0.513145	0.280816
FKBP4	0.743813	0.408131	0.303898	0.973753	0.635904	0.512911
FOXM1	0.970917	0.916154	0.644678	1.01351	0.644794	0.327504
TULP3	0.708957	0.365487	0.196587	1.03726	0.488013	0.310397
C12orf5	0.839332	0.474429	0.166512	0.948016	0.551249	0.180898
C12orf4	0.879735	0.559457	0.14277	1.02413	0.637089	0.204707
RAD51AP1	0.831605	0.548612	0.148733	0.98077	0.685795	0.194379
DYRK4	0.885066	0.588079	0.274728	0.948897	0.660894	0.358422
NDUFA9	0.851823	0.570054	0.263715	0.976713	0.763158	0.437355
CD9	0.86874	0.515467	0.25211	0.952572	0.705466	0.464537
TNFRSF1A	0.874357	0.376223	0.0775394	1.14106	0.468146	0.0763344
LTBR	0.766	0.49762	0.186997	1.03675	0.557608	0.174339
MRPL51	0.850222	0.661794	0.537051	1.08864	0.792933	0.628536
NCAPD2	0.908199	0.458325	0.151406	1.06945	0.443867	0.213108
CHD4	0.79684	0.470806	0.103492	1.028	0.607577	0.150962
ING4	0.740664	0.405555	0.119405	0.833662	0.494391	0.243547
COPS7A	0.762135	0.479636	0.268858	1.02185	0.687836	0.335224
PTMS	0.930125	0.674814	0.758229	1.25638	1.06698	1.00751
LAG3	0.82712	1.37527	8.46142	0.98375	4.01604	12.2238
CDCA3	0.744211	0.438429	0.26845	1.04116	0.564189	0.205666
USP5	0.777201	0.49786	0.191505	1.10894	0.661258	0.289414
TPI1	0.638542	0.353665	0.199475	1.09643	0.827739	0.54199
SPSB2	1.05475	0.360574	0.075249	0.943711	0.37952	0.0892634
LRRC23	0.968067	0.800187	0.457122	1.01539	0.599046	0.410933
ENO2	0.902036	0.49716	0.144421	1.12129	0.67124	0.2257
ATN1	0.947957	0.639986	0.163135	0.988581	0.515087	0.129748
CLSTN3	0.693191	1.00371	0.376685	0.880979	0.723259	0.148334
C12orf57	0.782359	0.573458	0.449681	1.03003	0.863824	0.78413
PTPN6	0.749376	0.398493	0.187842	0.929533	0.450333	0.406023
EMG1	0.80726	0.456784	0.162318	0.916564	0.605324	0.221417
LPCAT3	0.910521	0.582016	0.264536	1.10363	0.590935	0.239146
C1S	0.845711	0.667387	0.452551	1.07312	0.944536	0.803436
C1RL	0.802578	0.522543	0.299761	1.01234	0.564263	0.339267
M6PR	0.793406	0.515151	0.287975	1.02001	0.753484	0.470442
CLEC2B	0.991456	0.60858	0.296222	1.07184	0.811077	0.529254
YBX3	0.853798	0.769252	0.601785	1.05322	0.852555	0.483403
LRP6	0.868148	0.501698	0.179956	0.990628	0.452618	0.142403
MANSC1	0.907671	0.418349	0.231432	1.08093	0.474806	0.309323
DUSP16	0.800394	0.603533	0.483473	1.01115	0.71405	0.484348
CREBL2	0.74224	0.587278	0.646472	1.10377	0.689486	0.423437
DDX47	0.774019	0.443049	0.174594	0.990838	0.599325	0.180803
GPRC5A	0.776806	0.375826	0.0958985	0.992825	0.512544	0.145902
HEBP1	0.771602	0.532136	0.199515	1.02223	0.745761	0.360764
EMP1	0.981961	0.530831	0.100199	0.798388	0.527685	0.122011
ATF7IP	0.853905	0.466528	0.097238	1.01792	0.459127	0.113709
PLBD1	0.625544	0.489207	0.176145	0.962435	0.582287	0.332206
HIST4H4	0.623281	0.536932	0.200957	0.881391	0.939771	0.384848
WBP11	0.840402	0.584669	0.27949	1.02359	0.630391	0.368456
EPS8	0.746574	0.41399	0.128859	0.910791	0.447163	0.0988765
STRAP	0.839859	0.550624	0.199405	1.02723	0.57674	0.203956
DERA	0.775043	0.441121	0.179543	0.932622	0.59205	0.219866
AEBP2	0.770511	0.484211	0.242651	0.974565	0.616867	0.197747
SLCO1B3	0.971537	0.948068	0.314861	0.808777	0.553375	0.189916
RECQL	0.739579	0.507855	0.170988	0.909312	0.569288	0.267093
GOLT1B	0.799487	0.531553	0.217066	0.830798	0.56558	0.381826
ITPR2	1.07944	0.509494	0.111737	0.942197	0.43276	0.0846781
LDHB	0.803778	0.510923	0.144642	0.947249	0.681147	0.386966
CMAS	0.835151	0.654946	0.342924	0.965628	0.711691	0.428485
C2CD5	0.897931	0.564926	0.270079	0.986438	0.48621	0.174259
ETNK1	0.767155	0.485111	0.178438	0.891109	0.569817	0.292984
RASSF8	0.596011	0.482355	0.18003	0.881448	0.603236	0.167386
ASUN	0.766142	0.485498	0.218977	1.01483	0.585943	0.152873
FGFR1OP2	0.991708	0.666044	0.39196	0.844924	0.656241	0.374143
MED21	0.948592	0.372366	0.137059	0.901276	0.560457	0.164966
STK38L	0.949887	0.68475	0.200216	1.0049	0.773938	0.219907
ARNTL2	1.1309	1.61877	1.34301	0.887314	0.811744	0.296716
PPFIBP1	0.842319	0.611649	0.166138	1.00388	0.695813	0.169155
CAPRIN2	0.97959	0.959202	0.564269	0.831472	0.480569	0.167793
MRPS35	0.853053	0.533689	0.278691	0.961533	0.682977	0.380303
KLHL42	0.960977	0.513382	0.219772	1.03407	0.681946	0.253988
CCDC91	1.17899	0.533542	0.198941	0.969187	0.580745	0.207967
ERGIC2	1.00015	0.58719	0.271969	0.867239	0.592227	0.222469
IPO8	0.832643	0.447527	0.114052	1.00989	0.455597	0.106422
DENND5B	0.900146	0.474009	0.164315	1.09217	0.540638	0.111864
AMN1	1.0527	0.612222	0.230678	0.915457	0.596832	0.225845
H3F3C	0.767186	0.61181	0.258205	1.00768	0.964308	0.747267
KIAA1551	1.14936	0.424411	0.388382	1.08327	0.384445	0.301263
BICD1	1.07658	0.477753	0.221166	0.999452	0.549424	0.1973
DNM1L	0.895079	0.536841	0.191568	0.901142	0.5645	0.213872
YARS2	0.775729	0.414757	0.105137	0.910521	0.575721	0.14406
CPNE8	0.758026	0.502639	0.162426	0.957619	0.691135	0.32413
KIF21A	0.908179	0.621536	0.175991	1.0095	0.718942	0.253061
LRRK2	0.971575	0.458358	0.114763	1.00639	0.44162	0.124738
YAF2	0.937394	0.455583	0.207833	1.02211	0.620738	0.283907
ZCRB1	1.03234	0.647653	0.532135	0.887864	0.508797	0.349169
PPHLN1	0.825526	0.450578	0.173864	0.917436	0.609604	0.192527
PUS7L	0.929006	0.539398	0.206398	1.02935	0.681775	0.214569
ARID2	0.983079	0.601402	0.15282	0.928718	0.492286	0.137959
SCAF11	0.93204	0.538294	0.217663	1.01647	0.543489	0.178471
SLC38A1	0.833472	0.53316	0.145651	0.907335	0.573454	0.133946
SLC38A2	0.769781	0.339564	0.113844	0.838675	0.352866	0.162621
AMIGO2	0.826883	0.54559	0.228052	0.94058	0.572136	0.172715
PCED1B	0.756866	0.396875	0.163983	0.920612	0.474983	0.182623
RPAP3	0.81183	0.427057	0.129253	0.916364	0.554562	0.164914
SLC48A1	0.743093	0.462814	0.183054	0.895865	0.57614	0.298961
TMEM106C	0.875254	0.597386	0.346131	0.968128	0.664118	0.380804
PFKM	0.880127	0.4543	0.0835309	1.1061	0.53982	0.147513
ASB8	1.12258	0.621488	0.492521	0.934165	0.633794	0.468603
ZNF641	0.880148	0.594661	0.422903	0.917164	0.552624	0.230574
KANSL2	0.839575	0.441159	0.370321	0.98076	0.533713	0.342559
CCNT1	0.827287	0.394914	0.383372	0.97683	0.435434	0.455337
ADCY6	1.00051	0.491373	0.14827	1.14774	0.530962	0.204499
DDX23	0.898043	0.400127	0.162296	1.22282	0.636982	0.200416
RND1	1.6505	2.34526	0.874895	1.99807	3.29219	1.44341
FKBP11	0.688014	0.596724	0.546872	0.854543	0.818639	0.766053
ARF3	0.814765	0.513634	0.213438	0.99173	0.680421	0.347515
PRKAG1	0.910132	0.554004	0.209253	0.892317	0.564982	0.264212
KMT2D	0.943938	0.655644	0.329978	0.902904	0.564555	0.209329
TUBA1C	0.815625	0.450977	0.0937954	1.32684	1.17736	0.586792
TROAP	0.841192	0.609634	0.490779	0.979834	0.72284	0.616039
DNAJC22	0.913661	0.604038	0.272673	1.03635	0.597231	0.246206
SPATS2	0.87654	0.471998	0.149527	0.954898	0.535716	0.136336
MCRS1	0.695642	0.599216	0.251272	1.05021	0.693248	0.247048
LIMA1	1.24672	0.867743	0.405518	1.16124	0.890827	0.514046
TMBIM6	0.795635	0.52325	0.278016	0.966943	0.690758	0.554273
BCDIN3D	0.686333	0.550969	0.32139	0.874315	0.79478	0.352998
RACGAP1	0.732465	0.40402	0.0893424	1.03313	0.531573	0.107433
SMARCD1	0.763143	0.485188	0.0933904	0.892732	0.511496	0.156975
CERS5	0.85537	0.520852	0.247975	0.973346	0.590436	0.302096
LARP4	0.794145	0.576449	0.262393	0.881761	0.770099	0.295447
DIP2B	0.884731	0.552344	0.195893	1.18856	0.646658	0.218434
ATF1	0.669552	0.344238	0.13196	0.862817	0.532342	0.285049
SLC11A2	0.811049	0.460146	0.140459	0.914033	0.424962	0.124998
CSRNP2	0.826899	1.29761	1.11262	0.925539	1.31508	1.11353
TFCP2	1.18541	0.584554	0.305253	1.02509	0.572917	0.281191
KRT80	0.821933	0.627229	0.338106	1.14677	0.829909	0.462975
KRT7	0.686528	0.519024	0.226637	1.04519	0.801964	0.397026
KRT81	0.691314	0.534489	0.363579	1.01867	0.882158	0.771627
KRT18	0.92182	0.491268	0.114353	0.902918	0.401008	0.193937
TENC1	0.869827	0.329673	0.132509	1.40507	0.438558	0.124735
SPRYD3	0.696409	0.450606	0.0654591	0.933794	0.636539	0.143045
IGFBP6	0.768231	0.602809	0.338992	1.11275	0.996925	0.67158
ZNF740	0.806874	0.343019	0.0700183	0.99271	0.347719	0.135901
MFSD5	0.879627	0.471138	0.298402	1.04204	0.592191	0.440953
ESPL1	0.878902	0.42766	0.20918	1.03632	0.566972	0.338699
PFDN5	0.816859	0.515709	0.213158	0.914731	0.758799	0.49271
C12orf10	0.799593	0.591838	0.349442	0.992743	0.738689	0.549389
AAAS	0.748471	0.465871	0.192482	1.00212	0.613326	0.261006
SP1	0.954065	0.446654	0.189532	0.963022	0.501323	0.29954
PCBP2	0.727162	0.430932	0.224891	0.939489	0.554725	0.245172
MAP3K12	1.32925	0.274792	0.0675025	1.31624	0.359389	0.0669175
TARBP2	0.72582	0.562006	0.236705	1.02267	0.663331	0.324389
ATF7	0.853764	0.498285	0.149006	1.04551	0.764025	0.363782
ATP5G2	0.737367	0.548533	0.363265	1.12823	0.646043	0.481176
ITGA7	2.0732	3.31415	6.30722	0.801917	0.870904	6.99373
CALCOCO1	0.742575	0.381058	0.163717	0.981444	0.478953	0.163179
HOXC13	0.748858	0.373342	0.909857	0.852887	0.405985	0.720711
CBX5	0.948851	0.458863	0.123908	1.19362	0.659008	0.335549
ITGA5	0.938355	1.12526	0.46818	1.26275	1.74929	0.518304
BLOC1S1	0.848493	0.560512	0.522081	1.01135	0.804994	0.720124
DNAJC14	0.882897	0.542365	0.334701	1.14434	0.632223	0.310636
ORMDL2	0.902002	0.518173	0.254152	0.901617	0.600143	0.417876
WIBG	0.753818	0.464432	0.290192	1.16198	0.771438	0.492214
DGKA	0.680223	0.399071	0.147228	1.32061	0.622073	0.308206
CDK2	0.77912	0.481397	0.200289	1.01962	0.630508	0.244311
RAB5B	0.80655	0.412157	0.0834143	0.879793	0.40448	0.124541
SUOX	0.971311	0.297667	0.187115	1.50038	0.543668	0.261521
ESYT1	0.850907	0.432447	0.1372	1.10656	0.651077	0.198091
MYL6B	0.69651	0.479488	0.602455	1.08807	0.754563	0.576613
MYL6	0.630744	0.560384	0.282246	0.98682	0.791658	0.659918
SMARCC2	0.919193	0.449798	0.12773	0.969635	0.483425	0.130069
RNF41	0.753984	0.461548	0.183794	1.00097	0.640711	0.147801
PAN2	0.78714	0.456539	0.414041	0.86993	0.6388	0.753395
NABP2	0.788826	0.504505	0.361381	1.01749	0.64984	0.456053
ANKRD52	0.892884	0.510352	0.102251	1.04809	0.610349	0.177834
COQ10A	0.767318	0.666355	0.260303	0.996454	0.740405	0.313468
CNPY2	0.809653	0.580008	0.375634	0.989226	0.731957	0.545857
STAT2	0.809955	1.02512	0.599733	1.11513	3.88275	1.97376
TIMELESS	0.805427	0.448332	0.147102	1.10178	0.580604	0.151385
SPRYD4	0.925805	0.51927	0.42179	1.04669	0.685012	0.455637
BAZ2A	0.936414	0.627894	0.307258	1.00873	0.628294	0.312262
ATP5B	0.802648	0.549808	0.222082	0.989907	0.689614	0.335564
NACA	0.769168	0.717746	0.301195	0.826197	0.487534	0.393984
PRIM1	0.906656	0.332705	0.0844019	0.920458	0.445674	0.122229
TMEM194A	0.85958	0.40323	0.13948	1.03464	0.479988	0.123754
NAB2	0.840763	0.168532	0.148811	1.00247	0.233527	0.217185
STAT6	0.918834	0.581149	0.24783	1.00965	0.610754	0.203205
LRP1	0.933518	0.403715	0.0822145	1.15351	0.510465	0.12156
SHMT2	0.720661	0.534465	0.232138	0.982278	0.714441	0.330266
GLI1	1.094	0.586516	0.223073	0.848148	0.444992	0.175599
MARS	0.850729	0.507899	0.166293	1.02464	0.758449	0.229665
MBD6	1.18946	1.10564	0.547324	0.864874	0.594927	0.219562
DCTN2	0.795963	0.507026	0.236879	0.99066	0.646586	0.261429
PIP4K2C	0.868049	0.533388	0.184038	1.14448	0.662999	0.359743
DTX3	0.791802	0.723376	0.332567	0.918148	0.584595	0.39292
B4GALNT1	0.889437	0.474912	0.227714	0.972214	0.580233	0.18315
OS9	0.84653	0.500136	0.234957	1.08633	0.778209	0.455729
AGAP2-AS1	1.01997	0.50615	0.217808	1.02152	0.565246	0.176692
TSPAN31	0.818968	0.535411	0.357637	0.935607	0.636474	0.403252
CDK4	0.796784	0.50619	0.274809	1.02703	0.629485	0.292735
TSFM	0.796649	0.544658	0.206141	0.989264	0.721081	0.310177
CTDSP2	0.898435	0.466587	0.258806	0.903706	0.449105	0.185272
LRIG3	0.992651	0.657889	0.287666	1.255	0.759674	0.230769
USP15	0.933438	0.436624	0.21906	0.922059	0.556493	0.181036
MON2	1.03136	0.474649	0.102685	1.00567	0.4593	0.0893086
PPM1H	0.923037	0.528496	0.0982814	1.20516	0.537793	0.14267
TMEM5	0.851243	0.864418	0.885696	0.991795	0.828657	0.920454
C12orf66	0.795377	0.452781	0.132993	1.07017	0.520226	0.247616
TBK1	0.86319	0.44404	0.126691	0.860574	0.465016	0.131321
RASSF3	0.591252	0.375987	0.232005	0.976032	0.639571	0.441697
GNS	0.83878	0.503286	0.175829	1.0531	0.615532	0.360306
MDM1	0.774191	0.413767	0.708056	1.13144	0.495561	0.296511
LEMD3	0.912573	0.48569	0.235104	1.08805	0.516148	0.398114
TMBIM4	0.841085	0.534997	0.210628	0.882496	0.619908	0.318008
CAND1	0.898824	0.453876	0.102268	0.952248	0.487292	0.106587
DYRK2	1.01308	0.494957	0.18427	1.05692	0.442184	0.14927
NUP107	0.90078	0.502852	0.135136	0.944725	0.586936	0.167883
SLC35E3	0.938292	0.474461	0.231305	0.923579	0.52611	0.214508
MDM2	1.0449	0.619906	0.37256	1.2261	0.721404	0.529167
CPSF6	0.86753	0.659142	0.25358	0.938511	0.645137	0.247216
YEATS4	0.828531	0.544045	0.192156	0.917039	0.535579	0.193349
FRS2	0.887887	0.609823	0.849259	1.08966	0.559583	0.792554
CCT2	0.908293	0.594847	0.307173	0.949312	0.703597	0.481023
RAB3IP	0.844489	0.551196	0.258747	0.891426	0.561482	0.13975
CNOT2	0.802746	0.463122	0.129326	0.793019	0.443549	0.132617
ZFC3H1	0.933655	0.470768	0.223275	0.863131	0.397184	0.143149
TMEM19	0.787223	0.52232	0.211186	0.957118	0.528515	0.201911
RAB21	0.810168	0.520289	0.24446	0.975068	0.673646	0.267847
TBC1D15	0.948335	0.485129	0.167007	0.923169	0.495041	0.181345
ATXN7L3B	1.02848	0.570157	0.210203	1.05877	0.620456	0.333081
GLIPR1	0.847971	0.641935	0.330149	0.865131	0.783831	0.398732
KRR1	0.837226	0.598623	0.277638	0.948	0.609845	0.274736
PHLDA1	0.901717	0.30851	0.218161	0.936481	0.32942	0.159254
NAP1L1	1.32559	0.860508	0.238282	1.51243	0.87451	0.480033
BBS10	1.34469	1.04939	0.821405	0.98547	0.625696	0.451977
OSBPL8	0.869811	0.553017	0.194894	0.95224	0.490667	0.139413
ZDHHC17	0.699046	0.526058	0.14843	0.873545	0.516203	0.118885
NAV3	0.699444	0.915181	0.217746	0.686011	0.789504	0.185644
SYT1	0.836577	0.470188	0.132596	1.06171	0.526063	0.186281
CEP290	0.917202	0.569842	0.30751	0.96895	0.523186	0.204378
PAWR	0.763544	0.442867	0.129366	0.894179	0.58303	0.154289
PPP1R12A	0.877711	0.486009	0.162835	1.01179	0.595644	0.250635
TMTC2	0.838369	0.401579	0.103878	1.04933	0.498662	0.143661
C12orf29	0.913963	0.621757	0.468344	0.946976	0.6731	0.321027
TMTC3	1.0377	0.624496	0.240875	0.986103	0.680491	0.401515
KITLG	0.907007	0.627631	0.149743	0.925737	0.550425	0.164428
DUSP6	1.41138	0.853154	1.00466	1.57127	0.897634	1.2835
GALNT4	0.733311	0.489637	0.19821	0.780677	0.44127	0.192344
ATP2B1	0.85762	0.452072	0.116999	0.888542	0.432524	0.0821338
BTG1	0.817169	0.262941	0.114787	0.942987	0.32518	0.14026
EEA1	0.947913	0.398515	0.122795	0.974844	0.374941	0.145679
MRPL42	0.924435	0.486373	0.220375	0.794975	0.482288	0.260981
CRADD	0.983167	0.593423	0.174452	1.02596	0.595958	0.268582
NDUFA12	0.891042	0.576869	0.344158	1.02778	0.751493	0.626613
NR2C1	0.918718	0.594197	0.276546	0.954728	0.462536	0.264694
FGD6	0.813354	0.618183	0.431196	0.907521	0.449689	0.202948
VEZT	0.937338	0.467125	0.236495	0.915755	0.450036	0.125805
METAP2	0.929005	0.572569	0.389978	1.01358	0.674092	0.375193
NTN4	0.852349	0.554124	0.250872	1.01979	0.664588	0.275297
SNRPF	0.94473	0.719588	0.175328	1.17238	0.683598	0.417656
LTA4H	0.775161	0.523554	0.215912	0.927462	0.628939	0.276637
ELK3	0.893629	0.565054	0.363733	0.96448	0.551372	0.25707
NEDD1	1.02163	0.763499	0.300386	1.02029	0.91212	0.332593
TMPO	0.863268	0.477892	0.179819	1.03662	0.57655	0.256126
SLC25A3	0.806072	0.518137	0.203621	0.977639	0.619539	0.344988
IKBIP	0.778663	0.446305	0.241478	0.952449	0.590336	0.342478
APAF1	1.0376	0.635086	0.305398	1.0686	0.565748	0.397252
UHRF1BP1L	0.919537	0.560605	0.228712	0.934615	0.47096	0.0943866
ACTR6	0.80202	0.467821	0.225271	0.935629	0.57156	0.240484
SCYL2	0.897969	0.566242	0.183713	0.924355	0.567157	0.143047
GAS2L3	1.01989	0.557985	0.286427	0.909789	0.437091	0.128554
UTP20	0.842901	0.563993	0.145689	0.956103	0.631988	0.146805
ARL1	0.727205	0.501504	0.22769	0.949624	0.705695	0.373808
CHPT1	0.823975	0.713932	0.609779	0.976678	0.611488	0.3497
GNPTAB	0.88906	0.704163	0.254564	0.968608	0.543987	0.154889
DRAM1	0.742097	0.679021	0.398557	0.904095	0.773391	0.503903
NUP37	0.817425	0.424914	0.150187	0.994682	0.655472	0.257308
PARPBP	0.782944	0.486826	0.161565	0.88689	0.522416	0.159596
HSP90B1	0.887186	0.420016	0.151606	1.01167	0.601872	0.341415
HCFC2	0.696627	0.508887	0.187623	0.910379	0.595178	0.175937
EID3	1.8613	0.642723	0.415678	0.962575	0.442794	0.174168
CHST11	0.807076	0.494169	0.121294	0.938593	0.631032	0.144494
SLC41A2	0.841534	0.595706	0.220488	0.96119	0.734882	0.181588
C12orf45	0.882335	0.563073	0.215358	0.911606	0.650372	0.308103
KIAA1033	0.892575	0.623923	0.195596	0.933319	0.678536	0.189253
C12orf75	0.70394	0.567611	0.59865	0.888838	0.610746	0.389464
NUAK1	0.588666	0.451803	0.211139	0.769786	0.513052	0.209073
CKAP4	0.729418	0.525564	0.36308	1.0674	0.688386	0.55183
TCP11L2	0.70879	0.245789	0.0363719	0.901224	0.497558	0.185123
POLR3B	0.800791	0.704454	0.106996	0.88152	0.583757	0.14936
RIC8B	0.714004	0.505034	0.310513	0.853577	0.622613	0.282908
C12orf23	0.876754	0.493488	0.286401	0.899581	0.64976	0.301913
MTERFD3	0.479391	0.412307	0.167682	0.896523	0.484189	0.0815572
CRY1	0.809539	0.776446	0.349021	0.807076	0.727206	0.272468
BTBD11	0.860257	0.41905	0.0567291	1.0183	0.35713	0.0594327
PWP1	0.881935	0.550636	0.208975	0.96683	0.671907	0.229958
PRDM4	0.710684	0.576533	0.489765	0.997783	0.549038	0.368789
ACACB	0.98882	0.686585	0.227248	1.09321	0.567935	0.142328
FICD	0.682442	0.319158	0.861972	0.815677	0.5523	1.15448
SART3	0.81467	0.486305	0.214491	1.05428	0.580188	0.315472
SSH1	0.792615	0.78093	0.259912	0.899013	0.605288	0.190152
UNG	0.791034	0.419935	0.24828	0.960552	0.555103	0.284624
KCTD10	0.751754	0.55528	0.290423	0.971701	0.675911	0.39827
UBE3B	0.952859	0.627174	0.213473	1.05987	0.566907	0.238523
MMAB	0.976359	0.588216	0.295393	0.979536	0.659809	0.403353
MVK	0.849168	0.404023	0.114336	1.03366	0.520099	0.202944
TCHP	0.719757	0.422491	0.121645	1.1164	0.551117	0.199109
GIT2	1.02667	0.440339	0.0996864	0.955517	0.491866	0.15621
ANKRD13A	0.90131	0.532499	0.209835	1.04922	0.644895	0.28653
IFT81	0.944405	0.455924	0.172323	0.969147	0.488235	0.140083
ATP2A2	0.88031	0.461992	0.145698	1.00356	0.559701	0.190766
ANAPC7	0.874308	0.48282	0.163102	0.980338	0.650125	0.201846
FAM216A	0.515447	0.354066	0.205921	0.910857	0.573867	0.315974
VPS29	0.870845	0.519894	0.244923	0.921902	0.706467	0.414988
PPTC7	0.652874	0.498494	0.296031	0.76452	0.468913	0.35345
TCTN1	0.632917	0.550493	0.305968	0.965099	0.59375	0.296981
ATXN2	0.887282	0.392522	0.155418	0.888612	0.43233	0.159966
BRAP	0.949512	0.479479	0.292595	0.927328	0.551414	0.366481
ALDH2	0.768929	0.534994	0.270033	1.05299	0.75139	0.4722
MAPKAPK5	1.01576	0.762804	0.39343	0.94536	0.580306	0.146195
ERP29	0.902413	0.506775	0.22389	0.911047	0.661427	0.420056
NAA25	0.887026	0.511295	0.221252	0.903332	0.612135	0.235665
TRAFD1	0.907585	0.84624	0.739623	1.01183	1.19073	1.09015
OAS1	1.01919	2.52347	1.86607	1.29204	3.80549	2.53177
OAS3	0.813128	1.12601	0.450433	1.20751	2.579	0.924022
OAS2	6.54695	49.8829	54.9342	4.35285	58.0303	64.9652
DDX54	0.807332	0.500138	0.275424	1.02064	0.657945	0.301125
C12orf52	0.694118	0.672871	0.391869	0.932743	0.457433	0.180083
TPCN1	0.928498	0.537234	0.134971	1.06246	0.529065	0.142831
PLBD2	0.763809	0.481928	0.22793	1.06433	0.833837	0.403269
SDSL	0.841868	0.582258	0.362291	1.07487	0.78046	0.430768
MED13L	1.04302	0.74467	0.21628	1.10982	0.500674	0.10369
FBXW8	0.718205	0.432064	0.121632	1.0314	0.529622	0.236886
TESC	0.717227	0.474137	0.460621	0.887501	0.730281	0.354735
FBXO21	0.885203	0.568701	0.217387	0.950541	0.602089	0.239748
RFC5	0.804828	0.431508	0.133514	1.03588	0.532692	0.129122
WSB2	0.869516	0.996067	1.0468	0.99579	0.746631	0.482758
VSIG10	0.709956	0.511557	0.24759	1.02043	0.613887	0.30442
TAOK3	0.962805	0.590956	0.124471	0.957132	0.519659	0.13568
HSPB8	0.976134	0.958467	0.694654	1.30776	1.37298	0.884609
PRKAB1	0.803181	0.517473	0.200343	1.03363	0.654459	0.312925
CIT	0.945269	0.412081	0.0796142	1.07837	0.489297	0.121616
RAB35	0.771988	0.43291	0.110052	1.03306	0.716257	0.153359
GCN1L1	0.862702	0.422377	0.152876	0.959063	0.535246	0.240087
RPLP0	0.675849	1.0086	0.759702	1.2615	0.815952	0.926345
PXN	1.02285	0.630166	0.364528	1.00619	0.697164	0.335108
TRIAP1	0.767129	0.437491	0.487586	1.06308	0.846318	1.01852
SRSF9	0.727669	0.468407	0.263429	1.11409	0.817899	0.431046
COQ5	0.736307	0.442419	0.184725	0.996999	0.628582	0.343549
RNF10	1.04962	1.16603	0.852673	0.959701	0.666883	0.344862
POP5	0.871203	0.529256	0.251473	0.972602	0.688151	0.42045
MLEC	0.751204	0.601195	0.339872	1.05622	0.731812	0.486533
UNC119B	0.922559	0.471232	0.13769	1.25363	0.578686	0.207629
ACADS	0.914721	0.5752	0.218465	0.953891	0.653879	0.321738
SPPL3	0.807652	0.546046	0.35475	0.823165	0.468245	0.166064
C12orf43	0.811262	0.524367	0.209195	1.08483	0.631123	0.274612
OASL	12.296	73.4411	102.348	9.61233	66.1449	78.3302
CAMKK2	0.755958	0.57384	0.129087	1.01794	0.558547	0.182004
ANAPC5	0.748349	0.565055	0.200794	1.01408	0.6132	0.242267
RNF34	0.787288	0.524182	0.221766	1.02998	0.69781	0.408776
KDM2B	1.05783	0.505509	0.18099	1.02839	0.435268	0.201105
RHOF	0.639702	0.491302	0.342831	0.902589	0.658518	0.345916
SETD1B	0.915652	0.865716	1.23364	1.01754	1.01004	1.12806
PSMD9	0.829926	0.585468	0.325317	0.96871	0.778621	0.42521
MLXIP	0.855419	0.69257	0.135824	1.09305	0.617252	0.137343
VPS33A	0.963318	0.491846	0.142734	1.01554	0.545161	0.209182
CLIP1	0.908742	0.628685	0.289184	1.08469	0.67025	0.265946
ZCCHC8	0.79926	0.729963	0.606441	1.01356	0.907704	0.724182
RSRC2	0.936027	0.595777	0.755606	1.17752	0.601306	0.775779
KNTC1	1.11163	0.539974	0.184955	0.951248	0.473344	0.0768811
HIP1R	0.989327	1.84857	1.28095	1.69003	4.40623	2.16979
PITPNM2	1.21469	0.836313	0.14951	1.18817	0.710431	0.13101
VPS37B	0.667192	0.335951	0.145897	1.12205	0.440637	0.215388
OGFOD2	0.762946	0.492608	0.132905	1.05492	0.669031	0.231708
ARL6IP4	0.822451	0.665347	0.63118	1.13461	0.868324	0.787693
MPHOSPH9	0.866654	0.755132	0.341106	0.919807	0.343333	0.0957358
CDK2AP1	0.877861	0.575596	0.515503	0.971093	0.760247	0.655807
SNRNP35	0.999062	0.555158	0.079869	1.02268	0.682203	0.296638
RILPL1	0.906578	0.427687	0.292793	1.08252	0.667288	0.445092
TMED2	0.825841	0.586452	0.423245	1.03441	0.732963	0.72615
DDX55	0.893272	0.450655	0.339481	0.98935	0.6256	0.431233
EIF2B1	0.836885	0.495754	0.29308	0.914574	0.607342	0.275148
GTF2H3	0.914359	0.494782	0.273616	1.10967	0.682361	0.319613
TCTN2	0.72064	0.402489	0.392027	1.14467	0.615162	0.241115
ATP6V0A2	0.947021	0.566125	0.147193	1.01444	0.602214	0.140235
CCDC92	0.77489	0.7169	0.411261	1.09568	0.722	0.427963
ZNF664	1.26566	1.23252	0.66417	1.03201	0.585648	0.231496
SCARB1	0.831714	0.527691	0.239441	1.02561	0.618873	0.255004
DHX37	0.659821	0.483305	0.14945	0.966531	0.653109	0.219006
BRI3BP	0.772388	0.33913	0.176366	1.05954	0.690606	0.303725
AACS	0.822597	0.538254	0.226554	1.09067	0.683559	0.249124
SLC15A4	0.853482	0.501744	0.258354	1.0826	0.659402	0.381465
STX2	1.01423	0.536113	0.404686	0.936556	0.624466	0.214316
RAN	1.46366	0.712679	0.351556	1.2443	0.722848	0.562422
ULK1	0.724423	0.388005	0.128957	0.947764	0.541402	0.160944
PUS1	0.836603	0.678176	0.461737	1.08224	0.873671	0.560604
EP400	0.882132	0.522315	0.131797	1.05901	0.574341	0.113673
DDX51	0.721505	0.563571	0.219307	1.05586	0.773678	0.392181
NOC4L	0.674657	0.508982	0.158243	0.985158	0.653445	0.202809
FBRSL1	1.07972	0.806304	0.495118	0.88636	0.71431	0.315044
POLE	0.829399	0.507932	0.102397	0.935943	0.609681	0.095391
PXMP2	0.530463	0.689056	0.600686	0.897977	0.805319	0.617844
ANKLE2	0.786889	0.604009	0.269591	0.926414	0.815305	0.31033
GOLGA3	0.836941	0.702124	0.292117	1.03301	0.776786	0.371976
CHFR	0.709934	0.386284	0.122676	1.05833	0.54895	0.140086
MPHOSPH8	0.62391	0.40929	0.246958	1.01362	0.554469	0.275247
ZMYM2	0.74767	0.589609	0.275384	0.989494	0.593849	0.190053
CRYL1	1.05246	0.662185	0.432904	0.961915	0.745029	0.447038
IFT88	0.820483	0.467027	0.135483	0.977394	0.526516	0.160583
XPO4	0.818628	0.577953	0.113331	1.02618	0.485502	0.175729
LATS2	0.837297	0.516064	0.433733	1.03152	0.442241	0.349784
SAP18	0.946002	0.636545	0.387236	0.958335	0.779056	0.635184
SKA3	0.968221	0.428277	0.202492	0.925612	0.53022	0.156288
MRP63	0.696736	0.489792	0.3459	1.0917	0.839915	0.565995
MICU2	0.69615	0.471711	0.212202	0.897479	0.639335	0.338268
SACS	0.849879	0.717447	0.247294	0.9416	0.600987	0.164122
MIPEP	0.785422	0.533089	0.230521	1.01926	0.628755	0.205367
PARP4	1.01314	0.553553	0.163946	0.921676	0.560477	0.194992
CENPJ	0.716256	0.497398	0.303863	1.03625	0.6021	0.275852
MTMR6	0.82493	0.457621	0.158131	0.914762	0.571014	0.316326
NUPL1	0.769803	0.597592	0.31254	0.99582	0.708099	0.34715
RNF6	0.841683	0.563592	0.227629	0.970579	0.569882	0.282129
GTF3A	0.883526	0.723896	0.773919	0.938833	0.671196	0.504613
MTIF3	0.93353	0.557219	0.461972	0.96128	0.690201	0.376487
POLR1D	0.94168	0.782686	0.779291	0.891651	0.615602	0.692411
PAN3	0.988089	0.648106	0.230971	0.945197	0.476926	0.147734
POMP	0.811196	0.577751	0.327841	0.96817	0.732024	0.541017
SLC46A3	0.962572	0.395645	0.171245	0.908305	0.446848	0.188051
BRCA2	1.19274	0.827152	0.412867	1.11235	0.72424	0.47684
SLC7A1	0.747685	0.604042	0.14114	0.985419	0.73749	0.123456
USPL1	0.848146	0.677437	1.11728	0.97567	0.572175	0.758681
HSPH1	0.834158	0.498972	0.316615	1.04966	0.679731	0.73294
RFC3	0.883191	0.390814	0.0737306	0.919223	0.418644	0.0700848
SPG20	0.838039	0.577446	0.213443	0.949283	0.671505	0.23767
ALG5	0.731568	0.62582	0.393425	0.940481	0.793954	0.524176
EXOSC8	0.850225	0.530275	0.240526	0.975621	0.671456	0.297988
SUPT20H	0.899825	0.483061	0.23331	0.955045	0.554659	0.137487
PROSER1	1.07411	0.879842	0.486923	0.883565	0.61803	0.33279
NHLRC3	0.924957	0.429908	0.1756	0.984074	0.735361	0.232617
COG6	0.813184	0.541496	0.124914	0.96653	0.526312	0.141503
FOXO1	0.784549	0.251541	0.0464461	0.853377	0.216277	0.048459
MRPS31	0.882818	0.374235	0.234898	0.966959	0.494029	0.223114
ELF1	0.824092	0.766036	0.228922	0.888618	0.80137	0.200738
WBP4	0.876737	0.474637	0.405466	1.00782	0.703321	0.68053
MTRF1	0.704063	0.43167	0.243463	0.913857	0.722181	0.224
NAA16	0.883309	0.497089	0.254083	0.880701	0.508856	0.270394
VWA8	1.02459	0.521591	0.139963	0.993952	0.509512	0.107589
DGKH	1.00913	0.718442	0.0599224	0.987172	0.544482	0.109917
AKAP11	0.94697	0.427718	0.0923109	1.08399	0.502821	0.112053
TSC22D1	1.10886	0.490289	0.266539	1.00243	0.448157	0.232183
KIAA1704	1.07293	0.463513	0.299389	1.05415	0.573749	0.351171
GTF2F2	1.13382	0.478988	0.136282	0.823894	0.541965	0.162485
TPT1	0.421021	0.597249	0.365941	0.832043	1.13552	1.43291
COG3	0.634324	0.419611	0.233932	0.896421	0.528447	0.354112
ZC3H13	1.04605	0.670068	0.256875	1.06748	0.642714	0.380529
LRCH1	0.804967	0.369057	0.129927	1.11141	0.631548	0.195704
ESD	0.769263	0.560089	0.270998	0.927693	0.691731	0.359103
SUCLA2	0.956028	0.388469	0.100542	0.875474	0.636133	0.162172
NUDT15	0.629193	0.456631	0.354127	1.03931	0.9173	0.709735
MED4	0.959906	0.554874	0.187743	0.920384	0.44992	0.142616
ITM2B	0.904569	0.561356	0.276079	0.974468	0.680856	0.498017
RB1	0.850862	0.486561	0.18009	0.970563	0.545685	0.160387
FNDC3A	0.793079	0.649247	0.326532	0.759957	0.618918	0.347352
RCBTB1	1.17323	0.639149	0.274371	0.944215	0.515106	0.175067
EBPL	0.822044	0.724547	0.380953	0.946446	0.808088	0.563911
KPNA3	0.887063	0.456172	0.116895	1.03324	0.48638	0.157246
SPRYD7	0.737517	0.448577	0.343227	1.00651	0.651906	0.347511
TRIM13	0.949238	0.416109	0.288232	0.807799	0.347508	0.188627
RNASEH2B	0.69695	0.568796	0.225065	0.913072	0.619733	0.188314
UTP14C	1.04723	0.537501	0.369559	0.884311	0.460329	0.246651
THSD1	1.26512	0.920203	0.822939	1.13295	0.769952	0.606701
VPS36	0.730288	0.508469	0.221722	0.978942	0.569582	0.219283
CKAP2	0.970034	0.48159	0.128424	0.950983	0.470491	0.14333
SUGT1	0.792581	0.39931	0.11908	1.03076	0.684565	0.235636
DIAPH3	0.867141	0.458328	0.105482	1.07476	0.581462	0.117813
PCDH9	0.948132	0.49605	0.131286	1.1068	0.448821	0.0967705
BORA	0.839231	0.383044	0.193281	1.05321	0.638849	0.392575
DIS3	0.860772	0.568392	0.157007	0.894953	0.487957	0.129561
PIBF1	0.708388	0.320916	0.132968	0.969237	0.477059	0.167649
KLF5	0.697645	0.259011	0.135482	0.816421	0.268881	0.123981
TBC1D4	0.753499	0.445758	0.150126	1.12008	0.600704	0.219905
COMMD6	0.954583	0.589193	0.375448	0.997114	0.747275	0.579289
UCHL3	0.887587	0.578524	0.333399	0.817993	0.673714	0.426011
CLN5	0.873272	0.595426	0.297685	1.07051	0.713893	0.57697
FBXL3	0.705527	0.479415	0.188292	0.892488	0.482028	0.247318
RNF219	0.828964	0.546956	0.354153	0.87627	0.457255	0.568679
RBM26	0.976198	0.53416	0.182909	1.04792	0.531129	0.187328
NDFIP2	0.87722	0.507687	0.168923	0.966471	0.657213	0.231834
DZIP1	1.17395	0.910508	0.53805	1.20937	0.573718	0.216659
SPRY2	1.14842	0.640273	1.25421	1.13395	0.564343	0.642252
GPR180	0.875031	0.618656	0.474143	0.894047	0.741616	0.462383
ABCC4	0.98656	0.515088	0.153138	1.07047	0.507201	0.126194
DNAJC3	0.744283	0.410875	0.198565	0.856996	0.514027	0.316767
UGGT2	0.856331	0.443276	0.190421	0.961553	0.563319	0.174156
MBNL2	0.86615	0.413916	0.153936	0.901904	0.446124	0.179923
IPO5	0.834562	0.499036	0.174304	0.943785	0.546183	0.237407
FARP1	0.950289	0.5864	0.475874	1.05687	0.618533	0.258307
STK24	0.774663	0.57383	0.267198	1.07295	0.693397	0.154077
DOCK9	0.838084	0.446451	0.145067	1.22314	0.524622	0.087586
UBAC2	0.695915	0.476392	0.21916	0.973474	0.605679	0.228259
NALCN	0.819218	0.640315	0.188502	1.03208	0.560597	0.189196
TM9SF2	0.855405	0.507571	0.19943	0.967265	0.635288	0.305246
PCCA	0.914872	0.437893	0.137561	1.07677	0.599075	0.224717
TMTC4	0.936763	0.585748	0.291596	0.914363	0.544647	0.238187
TPP2	1.06021	0.512895	0.167489	1.00537	0.41161	0.136692
TEX30	0.893816	0.585661	0.223072	0.760791	0.753423	0.303436
BIVM-ERCC5	0.819783	0.472528	0.152165	0.980331	0.462598	0.221192
ARGLU1	0.689391	0.609875	0.642837	0.943766	0.668823	0.51459
LIG4	1.19857	0.911357	0.908282	0.849722	0.651882	0.710779
ABHD13	1.26947	0.731764	0.207904	0.895267	0.519588	0.115634
IRS2	0.86476	0.429322	0.251403	1.11022	0.440634	0.31461
COL4A1	0.596479	0.70857	0.519896	1.19931	1.15999	0.583568
COL4A2	0.625791	0.487189	0.168328	1.18209	0.80849	0.226134
CARKD	0.972884	0.584645	0.230866	0.91894	0.544879	0.165675
CARS2	0.803537	0.550527	0.360499	0.934097	0.717	0.392526
ANKRD10	0.850552	0.639053	0.563126	0.970176	0.874917	0.958861
ARHGEF7	0.847019	0.479324	0.125397	0.886621	0.561169	0.0956764
TUBGCP3	0.833049	0.547279	0.15892	0.993457	0.54907	0.117602
ATP11A	0.795368	0.599137	0.126743	1.07743	0.519983	0.134523
LAMP1	0.84118	0.488552	0.214346	1.0562	0.680581	0.315034
TMCO3	0.815298	0.825027	0.533031	1.00846	0.663086	0.330402
CDC16	0.743213	0.465568	0.154228	0.946881	0.561347	0.219569
TEP1	1.28745	0.684297	0.327837	0.997924	0.991695	0.33866
TTC5	0.696609	0.428806	0.166486	0.989768	0.613822	0.19126
CCNB1IP1	3.65463	4.5769	3.28468	0.897985	0.545034	0.310569
PARP2	0.866738	0.437299	0.310145	1.01682	0.547849	0.301053
OSGEP	0.697623	0.688404	0.307292	1.03046	0.788436	0.464895
TMEM55B	0.810019	0.433587	0.3103	1.00407	0.517696	0.416422
PNP	0.913629	1.03135	0.754291	1.08415	1.2738	1.11669
ANG	0.929468	0.577958	0.0935048	1.19622	0.609472	0.296992
RNASE4	0.939005	0.558165	0.29603	0.921664	0.712801	0.561263
METTL17	0.739312	0.464542	0.1702	0.975232	0.656576	0.269305
ARHGEF40	0.947832	0.580062	0.21953	1.06579	0.449251	0.151853
ZNF219	0.896916	0.884047	0.8425	0.965767	0.634446	0.255054
SUPT16H	1.05536	0.534995	0.218424	1.02141	0.496181	0.246589
CHD8	0.943185	0.670438	0.419474	1.00445	0.693686	0.464259
TOX4	0.762359	0.408729	0.226954	1.10591	0.659726	0.155591
METTL3	0.860916	0.470066	0.188875	0.908925	0.537892	0.195497
DAD1	0.820132	0.528638	0.278934	0.973008	0.779419	0.592493
ABHD4	0.738645	0.531437	0.234	1.00521	0.716921	0.312394
OXA1L	0.773241	0.523012	0.193144	1.00714	0.602378	0.242596
SLC7A7	0.842028	0.489945	0.218481	0.961687	0.557544	0.214967
MRPL52	0.756054	0.612117	0.444585	1.05747	0.887081	0.743754
LRP10	0.872022	0.65981	0.297641	1.04618	0.708146	0.27779
RBM23	0.789351	0.515538	0.157543	0.977441	0.61793	0.158696
PRMT5	0.758167	0.488895	0.243421	1.06588	0.646758	0.354575
HAUS4	0.976651	0.454118	0.138225	1.08518	0.683935	0.233285
AJUBA	0.697913	0.597451	0.26513	0.95126	0.773196	0.448659
PSMB5	0.772676	0.515226	0.218856	0.951358	0.738417	0.374951
ACIN1	0.753163	0.616416	0.412216	1.07561	0.759176	0.566774
C14orf119	0.995656	0.529387	0.159292	0.894201	0.478757	0.225121
BCL2L2-PABPN1	0.714366	0.577936	0.424471	0.999675	0.571754	0.33987
NGDN	0.775853	0.461675	0.145912	0.996835	0.694984	0.217606
THTPA	0.600424	0.400963	0.176022	1.05724	0.591113	0.213855
AP1G2	0.751377	0.474545	0.147213	0.91432	0.568407	0.164719
PCK2	0.892611	0.530072	0.228791	1.11205	0.789301	0.418453
DCAF11	0.816177	0.632803	0.255779	1.05265	0.599758	0.287501
PSME1	0.834683	0.666795	0.530454	1.04476	0.911915	0.84503
EMC9	0.896593	0.658481	0.463907	1.03585	0.912849	0.78833
RNF31	0.844095	0.552407	0.194852	1.02477	0.675675	0.257841
IRF9	1.00805	2.35118	1.67238	1.16655	3.54736	2.22894
IPO4	0.755764	0.33164	0.0469855	0.974105	0.440416	0.0726569
GMPR2	0.894853	0.486458	0.155693	0.991782	0.655405	0.235024
TINF2	0.72419	0.45437	0.191104	0.960891	0.500389	0.142272
RABGGTA	0.842566	0.628742	0.281594	0.929557	0.738707	0.278626
[truncated: 5,212 more rows]
