# Supplementary material for: A systematic view on influenza induced host shutoff
Source: eLife. 2016 Aug 15;5:e18311. doi: 10.7554/eLife.18311 (PMC5028189; doi:10.7554/eLife.18311)
Supplement: Supplementary file 2. — DOI: http://dx.doi.org/10.7554/eLife.18311.016 [file elife-18311-supp2.xlsx]

## Sheet: Sheet1
	Hours post IAV infection	RNA concentration (ng/ul)
exp #1	Mock	841.9
	2	838.9
	4	825.3
	8	960.7
exp #2	Mock	1104
	2	1077.5
	4	1008
	8	1010.3
