# Supplementary material for: A systematic view on influenza induced host shutoff
Source: eLife. 2016 Aug 15;5:e18311. doi: 10.7554/eLife.18311 (PMC5028189; doi:10.7554/eLife.18311)
Supplement: Supplementary file 3. — Positive values represent upregulation and negative values represent downregulation at the indicated time post infection. DOI: http://dx.doi.org/10.7554/eLife.18311.017 [file elife-18311-supp3.xlsx]

## Sheet: Sheet1
ucsc gene	gene symbol	pval_TE_4hpi	pval_TE_8h
uc001bqd.3	SNHG3	-0.961169	0.000331459
uc003era.1	STAG1	-0.862694	0.00700998
uc001art.3	TARDBP	-0.570206	-0.00729823
uc002mex.1	SLC25A23	1.25699e-06	0.00117265
uc001cgj.3	CITED4	-0.00890049	-0.364821
uc003eam.3	KIAA2018	2.74389e-06	0.000352241
uc001cyf.2	PCSK9	-0.200705	-0.007443
uc004ccr.3	RALGDS	3.34023e-05	0.0379977
uc001oup.1	UCP2	8.06982e-05	0.00327031
uc003bcj.1	TCF20	0.000104734	0.0571557
uc001ffr.3	PBXIP1	-0.315853	-0.00389973
uc001soj.1	MBD6	0.000160315	0.0371542
uc002voh.4	IRS1	0.000165368	0.204506
uc003hxk.3	TET2	0.000197077	0.0561388
uc003lgg.1	SLC35A4	0.000210255	0.00447007
uc001xbp.3	SOCS4	0.000240322	0.0196864
uc001fjm.3	FAM189B	0.000296997	0.138354
uc004cfr.1	PPP1R26	0.000305389	0.120004
uc001kqy.3	SCD	0.546844	-0.00544129
uc003mdy.3	KIAA1191	0.00030958	0.169937
uc001mty.3	QSER1	0.000408033	0.00262552
uc001lqh.3	IRF7	-0.000201433	-0.405428
uc001lrq.1	RPLP2	-0.469322	-0.00401273
uc001mfw.3	EIF3F	-0.00956607	-0.119552
uc001mil.1	ADM	-0.0087661	-0.122297
uc003dbd.3	RBM15B	0.000512845	0.138826
uc001ocx.3	FAU	-0.188078	-0.00239198
uc003mlx.3	CNOT6	0.000522663	0.230868
uc001ogp.3	BANF1	-0.00186919	-0.000116522
uc001jee.3	NPY4R	0.000714971	0.0668344
uc021qaj.2	IKZF5	0.00074014	0.49689
uc001owr.3	SERPINH1	-0.0221767	-0.000426811
uc001xrd.1	MLH3	0.00080249	0.000281782
uc001pmx.3	TIMM8B	-8.83327e-06	-0.000872183
uc001psx.3	ATP5L	-0.000896988	-0.00248909
uc001pyo.3	HSPA8	-0.317519	-0.00477698
uc001qrk.4	TPI1	-0.0650741	-0.001245
uc002hqi.4	MLLT6	0.00081855	0.0746866
uc001rtt.1	TUBA1C	-0.00996048	-0.0354144
uc001sjm.3	PA2G4	-0.528906	-0.00189029
uc001slc.3	STAT2	-2.73158e-08	-0.0340797
uc001xyp.3	TTC7B	0.000827668	0.03442
uc002hbu.3	KIAA0100	0.000912528	0.017767
uc001oew.3	MAP3K11	0.000931056	0.0338301
uc001uel.3	MPHOSPH9	0.000933734	0.000364883
uc001tug.3	OAS3	-0.00187237	-0.08193
uc001twu.1	PEBP1	-0.0434233	-7.89061e-05
uc002cgu.4	TMEM8A	0.00110993	0.00651924
uc001udj.1	HIP1R	-0.000624807	-0.19246
uc003mjj.3	ZNF354A	0.00119389	0.0194644
uc021twd.1	ARHGAP23	0.00122659	0.0790957
uc001uha.1	BRI3BP	-0.00875083	-0.559619
uc001vwy.4	CCNB1IP1	0.00143432	0.245214
uc002uyb.4	TRAK2	0.00144086	0.0120277
uc003cgk.3	EPM2AIP1	0.00148332	0.333168
uc001fex.3	ATP8B2	0.00149529	0.149829
uc001xjt.3	VTI1B	-0.00757448	-0.12999
uc001hvl.2	PCNXL2	0.00153586	0.000581743
uc001kdh.1	CCSER2	0.00164984	0.0345118
uc003nel.3	C6orf62	0.00177183	2.77963e-05
uc001yri.4	CRIP1	-0.0985026	-0.00344978
uc001yvc.3	NIPA1	-0.00798294	-0.465453
uc001zkq.2	SRP14	-0.000110516	-0.000770368
uc001iab.2	AKT3	0.00181803	0.000426011
uc002apv.3	RPL4	-0.492867	-0.00432195
uc003stv.3	SNX13	0.00189904	0.00140566
uc002gan.2	KIF1C	0.00219319	0.0538053
uc002csv.4	TNFRSF12A	-0.00938241	-0.542433
uc003wsj.1	MFHAS1	0.00220171	0.0249791
uc010okl.2	B4GALT2	0.00355365	0.016521
uc002nia.2	PIK3R2	0.00355499	0.121833
uc031roi.1	TET3	0.00377823	0.118062
uc001ldj.2	RAB11FIP2	0.00383096	0.0258719
uc010mwc.1	RC3H2	0.00418077	0.0523783
uc001lde.1	PDZD8	0.00425132	0.0117941
uc003vor.3	SMO	0.00425599	0.42455
uc002ifz.3	ATXN7L3	0.00434668	0.0484002
uc001coq.3	GPBP1L1	0.00457535	0.0335987
uc002hbp.3	ALDOC	-0.012689	-0.00116814
uc002ezj.3	MTSS1L	0.00524881	0.641583
uc002hhn.3	CDK5R1	-1.60655e-06	-0.282973
uc003zdf.3	PPP1R16A	0.00542398	0.149749
uc002hxj.3	EIF1	-0.00350665	-0.134046
uc002iib.3	PLCD3	0.00593733	0.016409
uc002kth.1	ESCO1	0.0066533	0.0015686
uc002iox.1	PHB	-6.34528e-05	-0.000985926
uc002jka.3	RPL38	0.937228	-0.000304298
uc002jwh.3	LGALS3BP	-0.0118672	-0.00500539
uc002kal.2	ACTG1	0.890625	-0.00062368
uc002sje.1	ALMS1	0.00686917	0.00554853
uc001hzd.3	CHML	0.00725997	0.0276793
uc002mcv.3	RPL36	-0.395865	-0.000829881
uc003zxa.3	TESK1	0.00728853	0.0771147
uc002mjq.1	ANGPTL4	-0.000423156	-0.0261847
uc002mml.2	PIN1	-0.00423647	-0.136041
uc002ghd.4	ZBTB4	0.00755454	0.185588
uc002njs.3	UBA52	-0.659121	-0.00615771
uc001sma.2	NACA	0.00778877	-0.824375
uc002olk.3	RPS16	-0.0177559	-0.00431944
uc002ort.3	RPS19	-0.660196	-0.000297489
uc001uga.3	ZNF664	0.00791349	0.0104888
uc002pab.3	APOE	-1.58038e-05	-0.00671772
uc002pjq.2	RPL18	0.568456	-0.00716847
uc002plb.4	NUCB1	-0.0076139	-0.0444558
uc002pob.2	RPS11	-0.259818	-2.16013e-05
uc002eqr.3	CES2	0.00824839	0.00784841
uc004fjs.1	IRAK1	0.00847098	0.0232908
uc002oyh.2	ZNF224	0.00857419	0.52335
uc021ojl.1	SEPN1	0.00861261	0.123794
uc002sgq.4	FAM136A	-0.00623022	-0.00858084
uc002sih.2	CYP26B1	-0.00568925	-0.175937
uc001typ.4	RNF10	0.00882377	0.0173523
uc002gyq.2	TMEM11	0.00883584	-0.324819
uc002uce.4	IFIH1	-0.00813899	-0.542372
uc002urz.2	MFSD6	0.00886804	0.0312032
uc003agz.3	LIF	0.00917582	0.319608
uc002fbd.3	ATXN1L	0.00943737	0.24487
uc002vgf.3	RPL37A	0.781164	-0.00017442
uc001ybo.3	BTBD7	0.00949283	0.0712461
uc002vyu.1	MYEOV2	-0.00672665	-0.0255171
uc002nyl.3	LSR	0.00967218	-0.899989
uc002wkw.4	PRNP	-0.0348856	-0.00468532
uc002xvq.3	BCAS4	-0.00326461	-0.212993
uc002xwx.3	PFDN4	-0.00141377	-0.196635
uc001ojr.3	LRFN4	0.00986566	0.0476623
uc002yal.3	ATP5E	-0.00508742	-0.504226
uc002ycr.3	RPS21	-0.271753	-0.00817908
uc010ekv.3	ARHGAP35	0.0108002	0.00274117
uc010xac.2	CEP192	0.0116446	0.00121054
uc003aoe.3	APOL6	-0.00325535	-0.0984721
uc003awe.3	TOMM22	-0.00139937	-0.0707924
uc003bao.1	XRCC6	-0.00609992	-6.3991e-06
uc002gwn.3	ULK2	0.0125516	0.00401731
uc002dll.3	USP31	0.0138173	0.00851638
uc002vzi.4	RNPEPL1	0.0148839	0.00695187
uc002tuo.3	R3HDM1	0.0149217	0.0057259
uc003swx.3	MPP6	0.0156998	0.00383067
uc003edu.3	NDUFB4	-0.00183226	-0.0282904
uc009zww.2	RAB35	0.0199371	0.000425884
uc003fpn.3	SENP2	0.0211042	0.00265335
uc003ics.4	USP53	0.0223875	0.00108189
uc003gjo.3	MRFAP1L1	-0.110343	-0.00219027
uc001rht.2	ARNTL2	0.0225805	0.00544244
uc021phs.1	ZBED6	0.0233794	0.00434617
uc002uqp.4	SLC40A1	0.0234214	0.00523148
uc003kkj.3	NR2F1	-0.00095779	-0.222388
uc001tdp.4	FGD6	0.0270212	0.00226983
uc003pfx.1	OGFRL1	0.0294909	0.00245352
uc003lgi.2	CD14	-0.00037194	-0.0348265
uc003wla.3	KMT2C	0.0346494	0.00809975
uc003meg.3	HIGD2A	-0.473135	-0.00929461
uc001msc.2	KIF18A	0.0349258	0.00567979
uc002scq.3	VPS54	0.040655	0.00157113
uc002evo.2	NFATC3	0.0413191	0.0033215
uc003ojt.2	SNRPC	-0.631683	-0.00985285
uc001iyw.4	CCNY	0.0584726	0.00302463
uc002xwv.2	CYP24A1	0.0607815	0.00598767
uc003pyr.3	GJA1	-0.00255361	-0.0446446
uc001wxs.4	SOS2	0.0669777	0.00246077
uc003sot.4	ACTB	-0.0638426	-0.000137277
uc003prb.3	POPDC3	0.0696202	0.00650305
uc010mqc.3	AGTPBP1	0.0900203	0.00815338
uc003sxu.3	CBX3	-0.522377	-0.00662031
uc003xwj.3	MYBL1	0.0947428	0.0087066
uc002yjy.1	USP25	0.097649	0.00167328
uc003vrp.1	AKR1B1	-0.303933	-0.00284657
uc002auc.3	PARP6	0.118538	0.0080601
uc011mxe.2	IDS	0.130422	0.00822422
uc001how.2	DNAH14	0.143606	0.000316286
uc001dqj.4	ARHGAP29	0.154118	0.00823361
uc003yif.3	RPL30	-0.0484408	-7.77167e-05
uc002sbe.3	USP34	0.162284	0.00684594
uc003zal.4	PARP10	-0.000194773	-0.175834
uc003hkm.3	CCNI	0.166722	0.00352306
uc001zyt.4	TRPM7	0.176125	0.0081304
uc004anf.4	HNRNPK	-0.462169	-0.00766592
uc004azh.3	SEC61B	-0.000952521	-0.0185033
uc004bep.2	TXN	-0.0335427	-0.00982745
uc004bpn.3	HSPA5	-0.122491	-0.00168061
uc003ypp.2	WDR67	0.197024	0.00399625
uc003uni.4	CASD1	0.198164	0.00951156
uc004erh.4	SLC25A5	-0.0115532	-0.000738682
uc001tgq.3	UHRF1BP1L	0.212615	0.000544724
uc009zmk.1	KRT8	-4.00999e-05	-5.7971e-05
uc001xgl.3	SYNE2	0.218599	0.00416276
uc010cak.3	PYCARD	-0.00422087	-0.529923
uc001dhq.3	ZZZ3	0.223812	0.00898922
uc010eng.3	CPT1C	-0.0764754	-0.00699403
uc010fiu.1	RPL31	-0.958292	-0.00361249
uc002ptg.3	C19orf48	0.229577	0.00140594
uc011kpm.2	MKLN1	0.249191	0.00986961
uc010nki.2	UQCRBP1	-0.000314192	-0.318341
uc002gwq.3	SPECC1	0.313423	0.00595661
uc010rdd.2	LDHA	-0.574326	-0.00586069
uc003eee.4	POLQ	0.330371	0.00416287
uc002sdz.1	ETAA1	0.333521	0.00868901
uc011dug.1	TOMM6	-0.00196595	-0.244806
uc003cnd.4	TCAIM	0.342855	0.00746418
uc011cpl.2	FYB	0.385453	0.000586568
uc021ohu.1	MINOS1	-0.0427488	-0.00282956
uc002lfg.2	MBD2	0.401393	0.00167267
uc003qpg.3	FBXO5	0.448754	0.00487687
uc021zba.2	DST	0.452724	0.00837218
uc021tav.1	ATP6V0C	-0.244797	-0.00847162
uc003xxo.2	ARFGEF1	0.462725	0.00475858
uc021xfp.1	SELT	-0.00854153	-0.0202223
uc001ozt.3	C11orf82	0.69986	0.006275
uc031rey.1	STRA13	-0.00141972	-0.293746
uc003lbz.2	FAM13B	0.736203	0.00355704
uc031sor.1	HSP90AB1	-0.608774	-0.00094516
