# Supplementary figures and images for: A systematic view on influenza induced host shutoff
Source: eLife journal article supplement (doi:10.7554/elife.18311), 2016-08-15

Figure 5- figure supplement 2

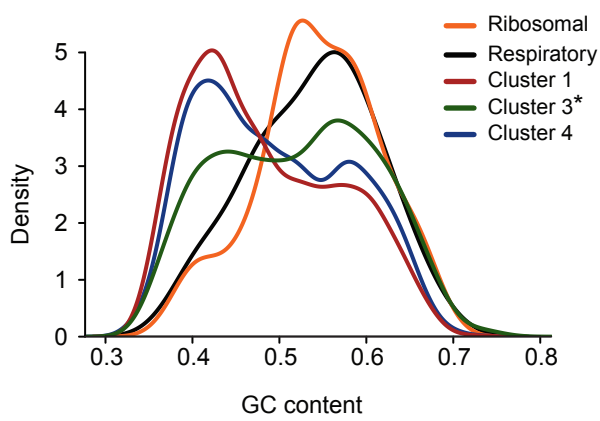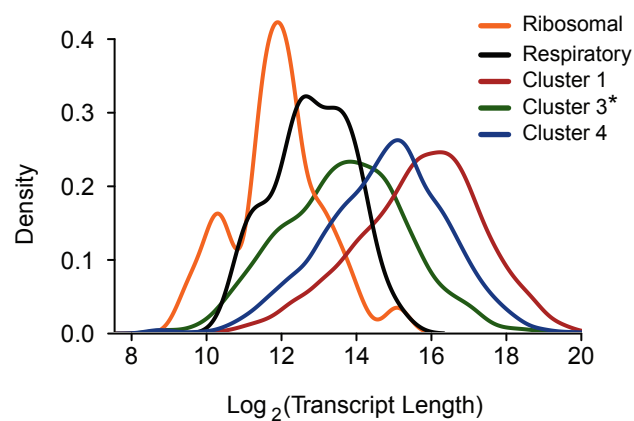

Supplement: supp [file elife-18311-supp-v1.zip]

Figure 2- figure supplement 1

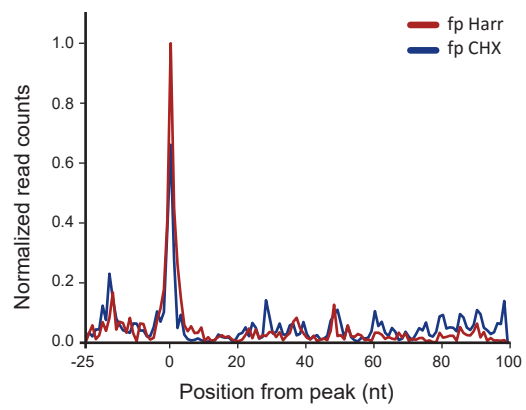

Supplement: supp [file elife-18311-supp-v1.zip]

Figure 2- figure supplement 2

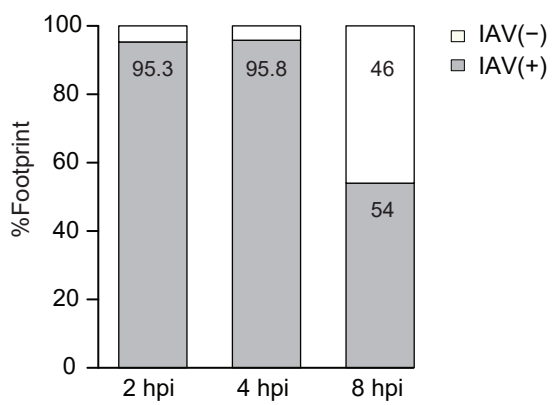

Supplement: supp [file elife-18311-supp-v1.zip]

Figure 5- figure supplement 1

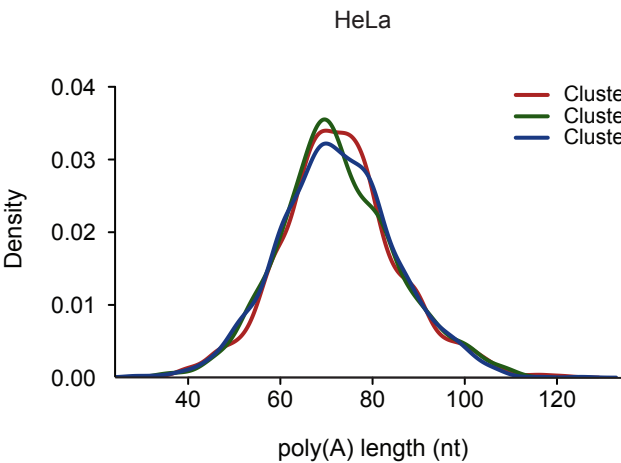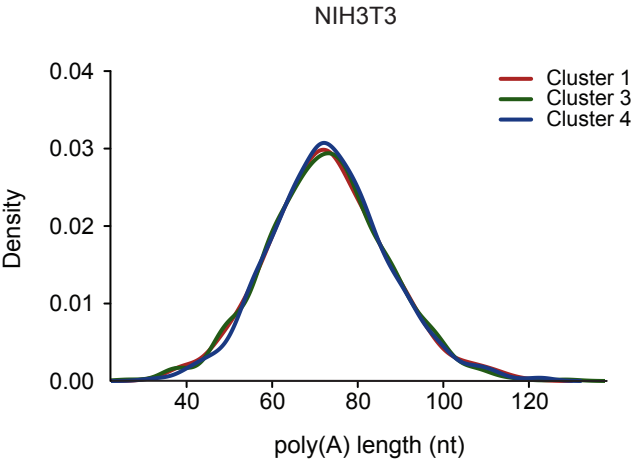

Supplement: supp [file elife-18311-supp-v1.zip]

Figure 6- figure supplement 1

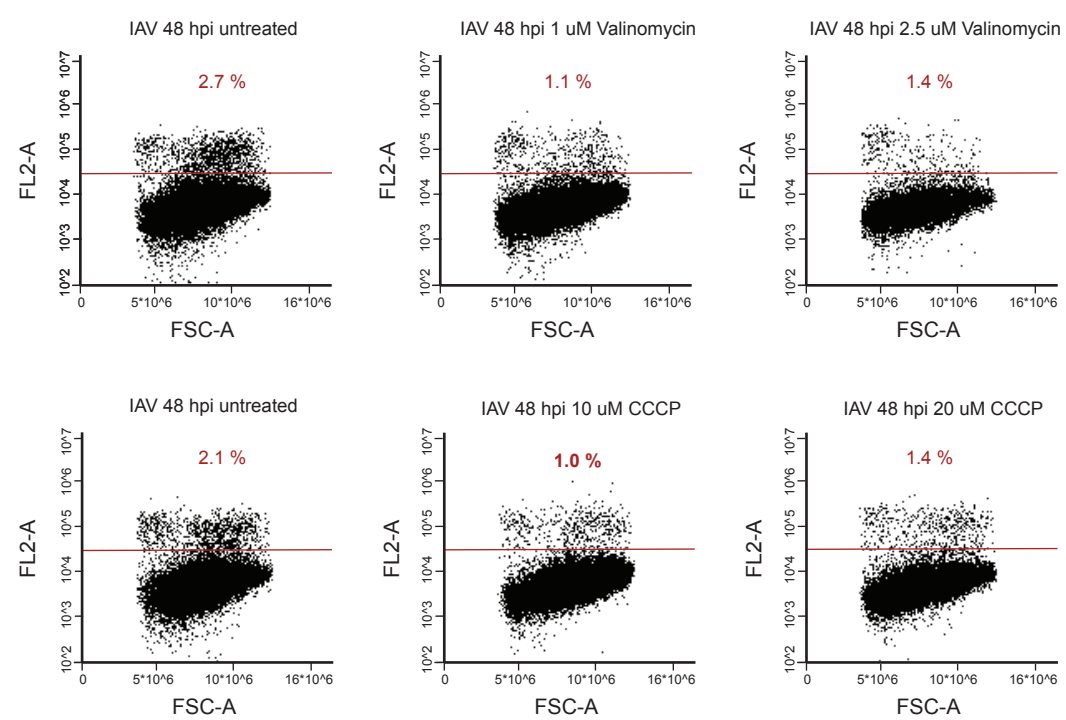

Supplement: supp [file elife-18311-supp-v1.zip]

Figure 3- figure supplement 1

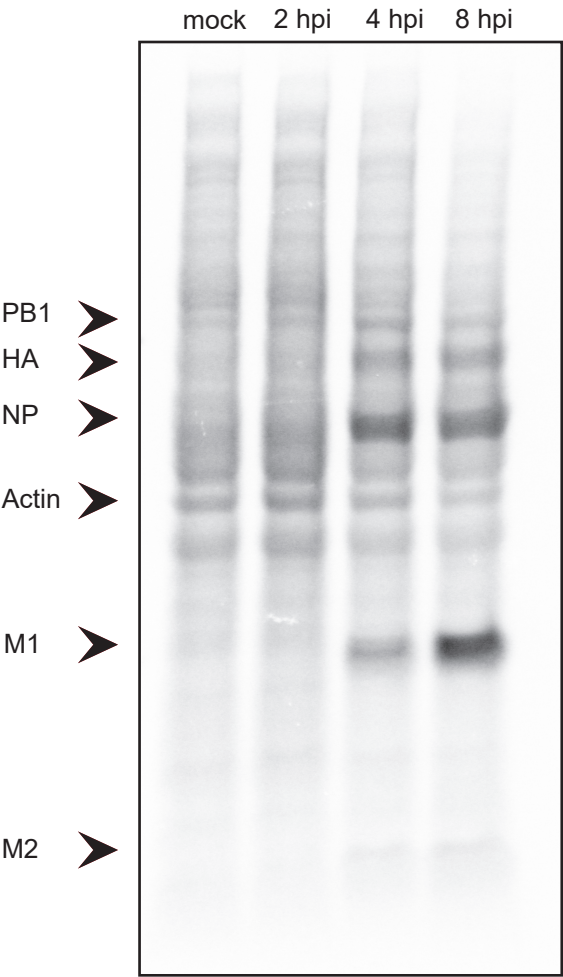

Supplement: supp [file elife-18311-supp-v1.zip]
